# Supplementary material for: Targeting mitophagy in diabetic retinopathy: novel insights into SQSTM1/BNIP3L pathway regulated by luteolin
Source: Front Pharmacol. 2025 Jun 25;16:1593213. doi: 10.3389/fphar.2025.1593213 (PMC12237918; doi:10.3389/fphar.2025.1593213)
Supplement: Supplementary file 4 [file Table5.XLS]

## Sheet: GSE248284-monocytes
Supplementary Tabel 5: KEGG analysis of highly expressed genes in monocytes
Category	Term	Count	%	PValue	Genes	List Total	Pop Hits	Pop Total	Fold Enrichment	Bonferroni	Benjamini	FDR
KEGG_PATHWAY	hsa05152:Tuberculosis	42	4.77816	5.78841e-14	CEBPB, ITGAM, RAB5C, ITGB2, TCIRG1, LSP1, CTSS, HLA-DMA, HLA-DMB, CLEC7A, LAMP2, ITGAX, MAPK1, CD14, BID, CTSD, HLA-DPA1, CD74, PLK3, ATP6V0B, HLA-DRB5, FCER1G, SYK, ATP6AP1, IL10RB, STAT1, IL10RA, IFNGR2, RHOA, TNFRSF1A, FCGR2A, IL1B, HLA-DPB1, HLA-DRA, RAF1, CLEC4E, ATP6V0D1, CALM2, MYD88, HLA-DRB1, HLA-DQB1, TLR2	535	180	8840	3.85545	1.82204e-11	1.82914e-11	1.23872e-11
KEGG_PATHWAY	hsa05140:Leishmaniasis	26	2.95791	1.17027e-12	ITGAM, NCF1, NCF2, NCF4, ITGB2, HLA-DMA, HLA-DMB, MAPK1, HLA-DPA1, JUN, HLA-DRB5, STAT1, IFNGR2, CYBB, CYBA, FOS, NFKBIA, FCGR2A, IL1B, HLA-DPB1, HLA-DRA, PTPN6, MYD88, HLA-DRB1, HLA-DQB1, TLR2	535	77	8840	5.57932	3.6864e-10	1.79089e-10	1.21282e-10
KEGG_PATHWAY	hsa04145:Phagosome	37	4.20933	1.70021e-12	ITGAM, RAB5C, NCF1, NCF2, NCF4, ITGB2, TCIRG1, CTSS, HLA-DMA, HLA-DMB, TUBA1A, CLEC7A, LAMP2, SEC61B, CD14, CD36, RAC1, ATP6V1E1, ATP6V1F, HLA-DPA1, ATP6V0B, HLA-DRB5, ATP6V0E1, ATP6AP1, CYBB, CYBA, FCGR2A, CANX, ATP6V1B2, HLA-DPB1, HLA-DRA, ITGA5, ATP6V0D1, HLA-DRB1, HLA-DQB1, TLR2, VAMP3	535	157	8840	3.89404	5.35562e-10	1.79089e-10	1.21282e-10
KEGG_PATHWAY	hsa05323:Rheumatoid arthritis	28	3.18544	3.90489e-12	CD86, CXCL8, CCL3L3, ITGB2, TCIRG1, ITGAL, TNFSF13B, ICAM1, HLA-DMA, HLA-DMB, CCL3, ATP6V1E1, ATP6V1F, HLA-DPA1, JUN, ATP6V0B, HLA-DRB5, ATP6V0E1, ATP6AP1, FOS, IL1B, ATP6V1B2, HLA-DPB1, HLA-DRA, ATP6V0D1, HLA-DRB1, HLA-DQB1, TLR2	535	94	8840	4.92185	1.23004e-09	3.08486e-10	2.08912e-10
KEGG_PATHWAY	hsa05132:Salmonella infection	46	5.23322	2.56391e-11	RAB5C, CXCL8, AHNAK, ARPC1B, LY96, BRK1, TXN, STX10, CDC42, PYCARD, PAK1, TUBA1A, CYTH4, RRAS, CASP4, CASP1, TNFSF10, FLNA, MAPK1, NLRP3, NCKAP1L, CD14, RAC1, S100A10, MAP2K3, ACTR2, JUN, DYNLT1, ANXA2, RHOG, ARPC4, ARPC5, FOS, DYNLL1, RHOA, RHOB, TNFRSF1A, NFKBIA, ARPC3, IL1B, CTNNB1, RAF1, GAPDH, MYD88, ARL8A, TLR2	535	251	8840	3.02819	8.0763e-09	1.62039e-09	1.09735e-09
KEGG_PATHWAY	hsa05135:Yersinia infection	32	3.6405	1.08785e-10	CXCL8, ROCK1, ARPC1B, PXN, WAS, CDC42, PYCARD, RPS6KA3, CASP1, PTK2B, MAPK1, NLRP3, RAC1, WASF2, MAP2K3, GIT2, ACTR2, JUN, RHOG, ARPC4, ARPC5, FOS, RHOA, NFKBIA, CD4, FCGR2A, ARPC3, GNAQ, IL1B, ITGA5, MYD88, SKAP2	535	138	8840	3.8315	3.42673e-08	5.72935e-09	3.88e-09
KEGG_PATHWAY	hsa04142:Lysosome	31	3.52673	1.61196e-10	CD63, ASAH1, HEXB, HEXA, CTSZ, CLTB, CLTA, TCIRG1, GNS, CTSS, LAPTM4A, LAMP2, PSAP, AP1S2, IDS, CTSH, CTSD, CTSB, CTSA, ATP6V0B, ATP6AP1, SLC11A1, GAA, LAPTM5, NAGA, NPC2, DMXL2, PPT1, TPP1, CD68, ATP6V0D1	535	132	8840	3.88049	5.07768e-08	7.27686e-09	4.928e-09
KEGG_PATHWAY	hsa04380:Osteoclast differentiation	32	3.6405	2.34622e-10	CSF1R, SPI1, NCF1, NCF2, NCF4, LILRA2, LILRA5, SIRPA, MAPK1, RAC1, JUNB, JUN, JUND, SYK, STAT1, IFNGR2, STAT2, CYBA, TYK2, LILRB2, FOS, LILRB3, TNFRSF1A, NFKB2, OSCAR, NFKBIA, TYROBP, FCGR2A, IL1B, FOSB, GRB2, SQSTM1	535	142	8840	3.72358	7.3906e-08	9.26757e-09	6.27614e-09
KEGG_PATHWAY	hsa05208:Chemical carcinogenesis - reactive oxygen species	41	4.66439	5.12285e-10	COX7B, NDUFA13, NCF1, NDUFA11, NCF2, PTEN, MGST1, NDUFB2, NDUFB1, UQCR11, UQCR10, COX5B, MT-ND2, COX5A, MT-ND3, MT-ND1, CYP1B1, HMOX1, MAPK1, RAC1, COX8A, JUN, GSTO1, PRKCD, NDUFA2, NDUFA1, AKR1A1, NDUFC2, CYBA, FOS, SOD2, COX6B1, NFKBIA, NDUFS7, UQCRQ, NDUFS6, CAT, UQCRC1, PPIF, GRB2, RAF1	535	226	8840	2.9976	1.6137e-07	1.79869e-08	1.2181e-08
KEGG_PATHWAY	hsa04932:Non-alcoholic fatty liver disease	33	3.75427	7.69834e-10	CEBPA, COX7B, NDUFA13, CXCL8, NDUFA11, NDUFB2, NDUFB1, IRS2, UQCR11, UQCR10, COX5B, COX5A, CDC42, RXRA, RAC1, BID, IL6R, COX8A, MLXIP, JUN, NDUFA2, NDUFA1, NDUFC2, FOS, TNFRSF1A, COX6B1, NDUFS7, UQCRQ, NDUFS6, IL1B, UQCRC1, MAP3K11, ATF4	535	157	8840	3.47306	2.42498e-07	2.43268e-08	1.64744e-08
KEGG_PATHWAY	hsa00190:Oxidative phosphorylation	30	3.41297	2.32249e-09	COX7B, NDUFA13, NDUFA11, COX17, NDUFB2, NDUFB1, UQCR11, TCIRG1, UQCR10, COX5B, MT-ND2, COX5A, MT-ND3, MT-ND1, ATP6V1E1, ATP6V1F, COX8A, ATP6V0B, ATP6V0E1, ATP6AP1, NDUFA2, NDUFA1, NDUFC2, COX6B1, NDUFS7, UQCRQ, NDUFS6, ATP6V1B2, UQCRC1, ATP6V0D1	535	138	8840	3.59204	7.31585e-07	6.67189e-08	4.51831e-08
KEGG_PATHWAY	hsa05131:Shigellosis	42	4.77816	2.93702e-09	CXCL8, ROCK1, ARPC1B, PXN, UBE2D1, U2AF1, CDC42, PYCARD, HK3, CYTH4, CAPNS1, CASP4, UBC, CASP1, CAPN2, MAPK1, NLRP3, CD14, RAC1, WASF2, CAST, ACTR2, JUN, PRKCD, ARPC4, ACTN4, ARPC5, RHOA, TNFRSF1A, RBX1, NFKBIA, DIAPH1, TNIP1, ARPC3, IL1B, HCLS1, ITGA5, TLN1, PLCB2, SQSTM1, CD44, MYD88	535	249	8840	2.78707	9.2516e-07	7.73415e-08	5.23768e-08
KEGG_PATHWAY	hsa05130:Pathogenic Escherichia coli infection	37	4.20933	3.67267e-09	RAB1A, CXCL8, ROCK1, ARPC1B, BRK1, CDC42, PYCARD, PAK1, TUBA1A, CYTH4, CASP4, CASP1, TNFSF10, MAPK1, NLRP3, NCKAP1L, RAC1, PAK2, WASF2, ACTR2, JUN, ARPC4, ARPC5, FOS, RHOA, TNFRSF1A, NFKBIA, FCGR2A, ARPC3, IL1B, MYH9, HCLS1, PTPN6, GAPDH, MYD88, MYO1F, MYO1G	535	203	8840	3.01165	1.15689e-06	8.92742e-08	6.04579e-08
KEGG_PATHWAY	hsa05415:Diabetic cardiomyopathy	36	4.09556	1.689e-08	COX7B, NDUFA13, NCF1, NDUFA11, NCF2, NCF4, PTEN, NDUFB2, NDUFB1, UQCR11, UQCR10, COX5B, MT-ND2, COX5A, MT-ND3, MT-ND1, PPP1CB, CD36, RAC1, CTSD, COX8A, G6PD, PRKCD, NDUFA2, NDUFA1, CYBB, NDUFC2, CYBA, COX6B1, NDUFS7, UQCRQ, NDUFS6, UQCRC1, PPIF, PLCB2, GAPDH	535	205	8840	2.90166	5.32035e-06	3.81232e-07	2.58176e-07
KEGG_PATHWAY	hsa05417:Lipid and atherosclerosis	37	4.20933	2.0161e-08	CXCL8, NCF1, NCF2, CCL3L3, NCF4, LY96, ICAM1, CDC42, PYCARD, RXRA, CASP1, CCL3, TNFSF10, MAPK1, NLRP3, CD14, CD36, RAC1, BID, LYN, MAP2K3, JUN, CYBB, CYBA, FOS, POU2F2, SOD2, RHOA, TNFRSF1A, NFKBIA, IL1B, PLCB2, CALM2, MYD88, ATF4, HSPA1A, TLR2	535	216	8840	2.83039	6.35068e-06	4.24724e-07	2.8763e-07
KEGG_PATHWAY	hsa05164:Influenza A	31	3.52673	1.11481e-07	CXCL8, ADAR, ICAM1, PYCARD, NXF1, HLA-DMA, HLA-DMB, PABPN1, CASP1, TNFSF10, MAPK1, NLRP3, BID, HLA-DPA1, HLA-DRB5, STAT1, IFNGR2, STAT2, MX2, TYK2, TNFRSF1A, NFKBIA, OAS1, HNRNPUL1, IL1B, HLA-DPB1, HLA-DRA, RAF1, MYD88, HLA-DRB1, HLA-DQB1	535	172	8840	2.97805	3.51159e-05	2.20175e-06	1.49106e-06
KEGG_PATHWAY	hsa05145:Toxoplasmosis	24	2.73038	1.41667e-07	MAP2K3, HLA-DRB5, IL10RB, STAT1, IL10RA, IFNGR2, LY96, TYK2, GNAI2, TNFRSF1A, NFKBIA, HLA-DMA, HLA-DMB, ALOX5, HLA-DPB1, PPIF, HLA-DRA, MAPK1, MYD88, HLA-DRB1, HSPA1A, HLA-DPA1, HLA-DQB1, TLR2	535	111	8840	3.57262	4.46243e-05	2.49979e-06	1.6929e-06
KEGG_PATHWAY	hsa04062:Chemokine signaling pathway	33	3.75427	1.42393e-07	CX3CR1, CXCL8, ROCK1, NCF1, CCL3L3, PXN, WAS, ARRB2, GNAI2, CDC42, PREX1, PAK1, GNG5, CCL3, PTK2B, MAPK1, RAC1, PRKACA, LYN, STAT1, STAT2, PRKCD, RHOA, FGR, NFKBIA, HCK, GNAQ, GNB2, GNB1, GRB2, DOCK2, RAF1, PLCB2	535	193	8840	2.82524	4.48529e-05	2.49979e-06	1.6929e-06
KEGG_PATHWAY	hsa05020:Prion disease	41	4.66439	2.15511e-07	COX7B, NDUFA13, NCF1, NDUFA11, NCF2, NCF4, NDUFB2, NDUFB1, UQCR11, UQCR10, COX5B, MT-ND2, COX5A, MT-ND3, PSMA7, MT-ND1, PSMB4, TUBA1A, PSMB3, MAPK1, RAC1, PRKACA, COX8A, EGR1, PRKCD, NDUFA2, NDUFA1, CYBB, NDUFC2, CYBA, COX6B1, PSMA4, NDUFS7, UQCRQ, NDUFS6, IL1B, CSNK2B, UQCRC1, PPIF, ATF4, HSPA1A	535	278	8840	2.4369	6.78837e-05	3.40938e-06	2.30889e-06
KEGG_PATHWAY	hsa04625:C-type lectin receptor signaling pathway	23	2.61661	2.15784e-07	PLK3, JUN, FCER1G, SYK, STAT1, STAT2, PRKCD, LSP1, RHOA, NFKB2, PYCARD, NFKBIA, PAK1, RRAS, CLEC7A, IL1B, IRF1, CASP1, NLRP3, MAPK1, RAF1, CLEC4E, CALM2	535	105	8840	3.6194	6.79696e-05	3.40938e-06	2.30889e-06
KEGG_PATHWAY	hsa04666:Fc gamma R-mediated phagocytosis	22	2.50284	2.73064e-07	LYN, VASP, ACTR2, SYK, NCF1, ARPC1B, PRKCD, INPPL1, WAS, ARPC4, ARPC5, CDC42, HCK, PAK1, MARCKS, FCGR2A, ARPC3, INPP5D, MAPK1, RAC1, RAF1, WASF2	535	98	8840	3.70933	8.60114e-05	4.10896e-06	2.78265e-06
KEGG_PATHWAY	hsa04640:Hematopoietic cell lineage	22	2.50284	3.27399e-07	CSF1R, HLA-DRB5, CSF3R, ITGAM, CD1D, HLA-DMA, CD4, HLA-DMB, IL1B, ANPEP, HLA-DPB1, HLA-DRA, CD14, CD36, ITGA5, IL6R, CD44, CD55, CD33, HLA-DRB1, HLA-DPA1, HLA-DQB1	535	99	8840	3.67186	0.000103125	4.70264e-06	3.1847e-06
KEGG_PATHWAY	hsa05012:Parkinson disease	38	4.32309	2.27147e-06	COX7B, NDUFA13, NDUFA11, LRRK2, NDUFB2, NDUFB1, UBE2L6, UQCR11, UQCR10, TXN, COX5B, MT-ND2, COX5A, MT-ND3, PSMA7, UBE2J1, GNAI2, MT-ND1, PSMB4, TUBA1A, PSMB3, UBC, PRKACA, COX8A, DUSP1, NDUFA2, NDUFA1, NDUFC2, COX6B1, PSMA4, NDUFS7, UQCRQ, NDUFS6, UQCRC1, PPIF, UBA1, CALM2, ATF4	535	271	8840	2.31693	0.000715259	3.12081e-05	2.11346e-05
KEGG_PATHWAY	hsa05416:Viral myocarditis	17	1.93402	2.41287e-06	CD86, HLA-DRB5, ITGB2, ITGAL, ICAM1, HLA-DMA, HLA-DMB, HLA-DPB1, HLA-DRA, RAC1, BID, CD55, HLA-DRB1, EIF4G2, HLA-DPA1, HLA-DQB1, EIF4G1	535	69	8840	4.07097	0.000759766	3.17695e-05	2.15148e-05
KEGG_PATHWAY	hsa05133:Pertussis	18	2.04778	2.93239e-06	JUN, ITGAM, CXCL8, ITGB2, LY96, FOS, RHOA, GNAI2, PYCARD, IL1B, IRF1, CASP1, NLRP3, MAPK1, CD14, ITGA5, CALM2, MYD88	535	78	8840	3.81308	0.000923277	3.70654e-05	2.51012e-05
KEGG_PATHWAY	hsa04670:Leukocyte transendothelial migration	22	2.50284	4.96067e-06	VASP, ITGAM, ROCK1, NCF1, NCF2, PXN, ITGB2, NCF4, CYBB, MSN, CYBA, ACTN4, ITGAL, RHOA, GNAI2, ICAM1, CDC42, PECAM1, CTNNA1, PTK2B, CTNNB1, RAC1	535	116	8840	3.13374	0.0015614	6.02913e-05	4.08302e-05
KEGG_PATHWAY	hsa04659:Th17 cell differentiation	21	2.38908	5.81967e-06	JUN, HLA-DRB5, STAT1, IFNGR2, TYK2, FOS, NFKBIA, HLA-DMA, CD4, HLA-DMB, RXRA, IL1B, HLA-DPB1, RARA, HLA-DRA, MAPK1, STAT6, IL6R, HLA-DRB1, HLA-DPA1, HLA-DQB1	535	108	8840	3.21288	0.00183152	6.81117e-05	4.61263e-05
KEGG_PATHWAY	hsa05022:Pathways of neurodegeneration - multiple diseases	55	6.25711	6.51198e-06	NDUFA13, COX7B, NDUFA11, LRRK2, UBE2L6, MT-ND2, MT-ND3, MT-ND1, TUBA1A, FRAT2, CAPN2, RAC1, RAB8A, COX8A, MAP2K3, GPX1, CYBB, NDUFC2, TNFRSF1B, COX6B1, TNFRSF1A, ATXN2L, PSMA4, NDUFS7, NDUFS6, IL1B, CSNK2B, CAT, UQCRC1, PPIF, RAF1, SQSTM1, PLCB2, ATF4, RAB1A, NDUFB2, NDUFB1, UQCR11, UQCR10, COX5B, COX5A, PSMA7, UBE2J1, PSMB4, PSMB3, UBC, MAPK1, BID, NDUFA2, NDUFA1, UQCRQ, GNAQ, CTNNB1, UBA1, CALM2	535	483	8840	1.88154	0.00204918	7.34924e-05	4.97702e-05
KEGG_PATHWAY	hsa04658:Th1 and Th2 cell differentiation	19	2.16155	7.65141e-06	NOTCH2, JUN, HLA-DRB5, STAT1, IFNGR2, TYK2, FOS, RBPJ, NFKBIA, HLA-DMA, CD4, HLA-DMB, HLA-DPB1, HLA-DRA, MAPK1, STAT6, HLA-DRB1, HLA-DPA1, HLA-DQB1	535	92	8840	3.41243	0.0024073	8.07998e-05	5.47188e-05
KEGG_PATHWAY	hsa04144:Endocytosis	35	3.9818	7.67086e-06	VPS29, RAB5C, SH3KBP1, ARPC1B, CLTB, CLTA, AP2A1, ARRB2, SNX3, CDC42, RAB11FIP1, SNX2, CYTH4, CHMP1B, AP2S1, RAB8A, SH3GLB1, GIT2, ACTR2, IQSEC1, ARPC4, ARPC5, ARAP1, RHOA, RAB10, ACAP2, RAB31, ARPC3, CAPZA1, CAPZA2, CHMP2A, SMAP2, SPG21, ARF5, HSPA1A	535	252	8840	2.29491	0.00241341	8.07998e-05	5.47188e-05
KEGG_PATHWAY	hsa04621:NOD-like receptor signaling pathway	29	3.2992	8.39517e-06	YWHAE, CXCL8, TNFAIP3, TXN, GABARAP, PYCARD, PSTPIP1, IFI16, CASP4, NAMPT, CASP1, MAPK1, NLRP3, NLRP1, CTSB, JUN, STAT1, STAT2, PRKCD, CYBB, CYBA, TYK2, RHOA, NFKBIA, OAS1, IL1B, CARD16, PLCB2, MYD88	535	189	8840	2.53533	0.002641	8.55766e-05	5.79538e-05
KEGG_PATHWAY	hsa05010:Alzheimer disease	47	5.34699	8.79908e-06	RTN3, COX7B, NDUFA13, LRP1, NDUFA11, NDUFB2, NDUFB1, IRS2, UQCR11, UQCR10, COX5B, MT-ND2, COX5A, MT-ND3, RTN4, PSMA7, MT-ND1, PSMB4, TUBA1A, FRAT2, PSMB3, CAPN2, MAPK1, BID, COX8A, NDUFA2, NDUFA1, CYBB, ADAM10, NDUFC2, TNFRSF1A, COX6B1, PSMA4, NDUFS7, UQCRQ, NDUFS6, GNAQ, IL1B, CSNK2B, UQCRC1, PPIF, CTNNB1, RAF1, PLCB2, GAPDH, CALM2, ATF4	535	391	8840	1.98618	0.00276789	8.6891e-05	5.88439e-05
KEGG_PATHWAY	hsa05166:Human T-cell leukemia virus 1 infection	32	3.6405	1.05218e-05	CDKN1A, SPI1, ITGB2, PTEN, ITGAL, ANAPC11, ICAM1, HLA-DMA, ZFP36, HLA-DMB, TSPO, MAPK1, PRKACA, HLA-DPA1, EGR1, MAP3K3, JUN, HLA-DRB5, MAP3K1, FOS, TNFRSF1A, NFKB2, NFKBIA, CD4, CANX, HLA-DPB1, HLA-DRA, LTBR, TLN1, HLA-DRB1, ATF4, HLA-DQB1	535	223	8840	2.37107	0.00330889	0.000100754	6.82322e-05
KEGG_PATHWAY	hsa05169:Epstein-Barr virus infection	30	3.41297	1.19354e-05	CDKN1A, TNFAIP3, ITGAL, RBPJ, ICAM1, HLA-DMA, HLA-DMB, RAC1, BID, HLA-DPA1, LYN, MAP2K3, JUN, HLA-DRB5, SYK, STAT1, STAT2, TYK2, TAPBP, NFKB2, NFKBIA, OAS1, HLA-DPB1, HLA-DRA, VIM, CD44, MYD88, HLA-DRB1, HLA-DQB1, TLR2	535	203	8840	2.44188	0.00375262	0.000110929	7.51228e-05
KEGG_PATHWAY	hsa05100:Bacterial invasion of epithelial cells	17	1.93402	1.30592e-05	ACTR2, ARPC1B, PXN, RHOG, CLTB, CLTA, ARPC4, ARPC5, RHOA, CDC42, ARPC3, CTNNA1, HCLS1, CTNNB1, RAC1, ITGA5, WASF2	535	78	8840	3.60125	0.00410521	0.000117906	7.98474e-05
KEGG_PATHWAY	hsa05163:Human cytomegalovirus infection	32	3.6405	1.38278e-05	CDKN1A, CXCL8, ROCK1, CCL3L3, PXN, GNAI2, AKAP13, GNG5, CCL3, EIF4EBP1, PTK2B, MAPK1, RAC1, BID, PRKACA, IL6R, IL10RB, IL10RA, RHOA, TNFRSF1A, TAPBP, NFKBIA, GNAQ, GNB2, IL1B, GNB1, CTNNB1, GRB2, RAF1, PLCB2, CALM2, ATF4	535	226	8840	2.33959	0.00434632	0.000121378	8.21987e-05
KEGG_PATHWAY	hsa05120:Epithelial cell signaling in Helicobacter pylori infection	16	1.82025	1.67223e-05	LYN, JUN, ATP6V0B, ATP6V0E1, CXCL8, ATP6AP1, ADAM10, TCIRG1, CDC42, NFKBIA, PAK1, ATP6V1B2, RAC1, ATP6V1E1, ATP6V0D1, ATP6V1F	535	71	8840	3.72358	0.00525371	0.000142817	9.6718e-05
KEGG_PATHWAY	hsa04612:Antigen processing and presentation	17	1.93402	1.82894e-05	CD74, HLA-DRB5, IFI30, CTSS, TAPBP, HLA-DMA, CD4, HLA-DMB, CANX, HLA-DPB1, HLA-DRA, PSME2, HLA-DRB1, CTSB, HSPA1A, HLA-DPA1, HLA-DQB1	535	80	8840	3.51121	0.00574464	0.000152091	0.000102998
KEGG_PATHWAY	hsa04810:Regulation of actin cytoskeleton	32	3.6405	1.97123e-05	ITGAM, ROCK1, ARPC1B, PXN, ITGB2, BRK1, IQGAP1, ITGAL, IQGAP2, CDC42, PPP1CB, PAK1, RRAS, TMSB4X, ITGAX, MAPK1, NCKAP1L, RAC1, PAK2, WASF2, ACTR2, MSN, ARPC4, ACTN4, ARPC5, SSH2, RHOA, DIAPH1, ARPC3, MYH9, ITGA5, RAF1	535	230	8840	2.2989	0.00619019	0.00015972	0.000108165
KEGG_PATHWAY	hsa04620:Toll-like receptor signaling pathway	20	2.27531	2.44044e-05	MAP2K3, CD86, JUN, CXCL8, STAT1, CCL3L3, STAT2, LY96, TYK2, FOS, NFKBIA, IL1B, TOLLIP, CCL3, MAPK1, IRF5, CD14, RAC1, MYD88, TLR2	535	109	8840	3.03181	0.007658	0.000192795	0.000130563
KEGG_PATHWAY	hsa04662:B cell receptor signaling pathway	18	2.04778	2.57821e-05	LYN, JUN, SYK, INPPL1, DAPP1, LILRB2, FOS, LILRB3, LILRA2, LILRA5, NFKBIA, INPP5D, MAPK1, GRB2, PTPN6, RAC1, PIK3AP1, RAF1	535	91	8840	3.26836	0.00808858	0.000198711	0.00013457
KEGG_PATHWAY	hsa04928:Parathyroid hormone synthesis, secretion and action	20	2.27531	5.27457e-05	EGR1, CDKN1A, MEF2C, JUND, FOS, ARRB2, RHOA, GNAI2, NR4A2, AKAP13, MAFB, RXRA, WNK1, GNAQ, MAPK1, RAF1, SGK1, PRKACA, PLCB2, ATF4	535	115	8840	2.87363	0.0164781	0.000396848	0.000268752
KEGG_PATHWAY	hsa05170:Human immunodeficiency virus 1 infection	29	3.2992	7.77298e-05	PXN, SAMHD1, GNAI2, PAK1, GNG5, AP1S2, PTK2B, MAPK1, RAC1, BID, PAK2, MAP2K3, JUN, FOS, TNFRSF1B, TNFRSF1A, TAPBP, RBX1, BST2, NFKBIA, CD4, GNAQ, GNB2, GNB1, RAF1, CALM2, MYD88, APOBEC3A, TLR2	535	213	8840	2.24966	0.0241885	0.000571224	0.000386841
KEGG_PATHWAY	hsa05150:Staphylococcus aureus infection	18	2.04778	8.98499e-05	CFD, HLA-DRB5, SELPLG, ITGAM, ITGB2, C5AR1, PTAFR, FPR1, ITGAL, ICAM1, HLA-DMA, FCGR2A, HLA-DMB, HLA-DPB1, HLA-DRA, HLA-DRB1, HLA-DPA1, HLA-DQB1	535	100	8840	2.97421	0.0279072	0.000645286	0.000436997
KEGG_PATHWAY	hsa05134:Legionellosis	13	1.47895	0.000100752	RAB1A, ITGAM, CXCL8, ITGB2, NFKB2, PYCARD, NFKBIA, IL1B, CASP1, CD14, MYD88, HSPA1A, TLR2	535	56	8840	3.83578	0.0312401	0.000707503	0.000479132
KEGG_PATHWAY	hsa05321:Inflammatory bowel disease	14	1.59272	0.000110727	JUN, HLA-DRB5, STAT1, IFNGR2, HLA-DMA, HLA-DMB, IL1B, HLA-DPB1, HLA-DRA, STAT6, HLA-DRB1, HLA-DPA1, HLA-DQB1, TLR2	535	65	8840	3.55888	0.0342797	0.00076065	0.000515123
KEGG_PATHWAY	hsa05014:Amyotrophic lateral sclerosis	42	4.77816	0.000114206	RAB1A, COX7B, NDUFA13, NDUFA11, NDUFB2, NDUFB1, UQCR11, UQCR10, COX5B, MT-ND2, COX5A, MT-ND3, PSMA7, MT-ND1, NXF1, PSMB4, TUBA1A, PSMB3, CASP1, RAC1, BID, RAB8A, COX8A, NUP214, MAP2K3, GPX1, NDUFA2, NDUFA1, CHCHD10, NDUFC2, TNFRSF1B, TNFRSF1A, COX6B1, ATXN2L, PSMA4, NDUFS7, UQCRQ, NDUFS6, CAT, UQCRC1, SQSTM1, ATF4	535	371	8840	1.87057	0.0353376	0.000767856	0.000520004
KEGG_PATHWAY	hsa05016:Huntington disease	37	4.20933	0.000116975	COX7B, NDUFA13, NDUFA11, NDUFB2, CLTB, NDUFB1, CLTA, UQCR11, AP2A1, UQCR10, COX5B, MT-ND2, COX5A, MT-ND3, PSMA7, MT-ND1, PSMB4, TUBA1A, PSMB3, AP2S1, POLR2E, POLR2L, COX8A, GPX1, NDUFA2, NDUFA1, NDUFC2, SOD2, COX6B1, PSMA4, NDUFS7, UQCRQ, NDUFS6, GNAQ, UQCRC1, PPIF, PLCB2	535	311	8840	1.9658	0.0361787	0.000770088	0.000521515
KEGG_PATHWAY	hsa05167:Kaposi sarcoma-associated herpesvirus infection	27	3.07167	0.000119775	CD86, CDKN1A, CXCL8, ICAM1, PREX1, ZFP36, GNG5, UBC, MAPK1, RAC1, BID, LYN, ATG3, JUN, SYK, STAT1, STAT2, TYK2, FOS, TNFRSF1A, NFKBIA, HCK, GNB2, GNB1, CTNNB1, RAF1, CALM2	535	196	8840	2.27618	0.0370284	0.000772427	0.000523099
KEGG_PATHWAY	hsa04217:Necroptosis	23	2.61661	0.000214697	STAT1, IFNGR2, STAT2, CYBB, TNFAIP3, TYK2, CFLAR, PYGL, TNFRSF1A, PYCARD, IL1B, CHMP1B, FTH1, CASP1, TNFSF10, CHMP2A, CAPN2, NLRP3, STAT6, BID, GLUL, SQSTM1, FTL	535	159	8840	2.39017	0.0654003	0.00135689	0.000918905
KEGG_PATHWAY	hsa05418:Fluid shear stress and atherosclerosis	21	2.38908	0.000294689	JUN, MEF2C, NCF1, GSTO1, NCF2, DUSP1, GSTP1, MGST1, CYBA, FOS, TXN, RHOA, ICAM1, TNFRSF1A, IL1B, PECAM1, HMOX1, CTNNB1, RAC1, CALM2, SQSTM1	535	141	8840	2.46093	0.0886613	0.00182591	0.00123654
KEGG_PATHWAY	hsa05310:Asthma	9	1.02389	0.000384481	HLA-DMA, HLA-DRB5, HLA-DMB, FCER1G, HLA-DPB1, HLA-DRA, HLA-DRB1, HLA-DPA1, HLA-DQB1	535	31	8840	4.79711	0.114086	0.00233646	0.00158229
KEGG_PATHWAY	hsa04912:GnRH signaling pathway	16	1.82025	0.000416532	MAP2K3, EGR1, MAP3K3, JUN, MAP3K1, PRKCD, CDC42, GNAQ, PTK2B, MAPK1, GRB2, RAF1, PRKACA, CALM2, PLCB2, ATF4	535	93	8840	2.84273	0.122988	0.00243849	0.00165139
KEGG_PATHWAY	hsa04714:Thermogenesis	29	3.2992	0.000416705	COX7B, NDUFA13, SMARCD3, NDUFA11, COX17, NDUFB2, NDUFB1, UQCR11, UQCR10, COX5B, MT-ND2, COX5A, MT-ND3, MT-ND1, RPS6KA3, PRKACA, COX8A, MAP2K3, NDUFA2, NDUFA1, NDUFC2, ARID1A, COX6B1, NDUFS7, UQCRQ, NDUFS6, UQCRC1, GRB2, PNPLA2	535	235	8840	2.03905	0.123036	0.00243849	0.00165139
KEGG_PATHWAY	hsa04140:Autophagy - animal	23	2.61661	0.000512256	SH3GLB1, RAB1A, ATG3, MTMR14, PRKCD, PTEN, IRS2, CFLAR, GABARAP, CAMKK2, VAMP8, VMP1, ATG16L2, RRAS, LAMP2, UBC, MAPK1, RAF1, PRKACA, CTSD, SQSTM1, RAB8A, CTSB	535	169	8840	2.24874	0.14905	0.00294314	0.00199314
KEGG_PATHWAY	hsa04064:NF-kappa B signaling pathway	17	1.93402	0.000521954	LYN, CXCL8, SYK, BCL2A1, TNFAIP3, LY96, CFLAR, TNFSF13B, NFKB2, ICAM1, TNFRSF1A, NFKBIA, IL1B, CSNK2B, CD14, LTBR, MYD88	535	105	8840	2.67521	0.151647	0.00294531	0.00199461
KEGG_PATHWAY	hsa04530:Tight junction	23	2.61661	0.000556015	VASP, ACTR2, JUN, MAP3K1, ROCK1, ARPC1B, WAS, MSN, ARPC4, ARPC5, CD1D, ACTN4, YBX3, RHOA, CDC42, MYL6, TUBA1A, ARPC3, MYH9, HCLS1, RAC1, PRKACA, RAB8A	535	170	8840	2.23551	0.160705	0.0030787	0.00208494
KEGG_PATHWAY	hsa04010:MAPK signaling pathway	34	3.86803	0.000574336	CSF1R, ARRB2, RASGRP4, RPS6KA4, CDC42, RPS6KA3, PAK1, RRAS, FLNA, MAPK1, CD14, RAC1, PRKACA, PAK2, MAP4K4, MAP2K3, MAP3K3, JUN, MEF2C, JUND, MAP3K1, DUSP1, FOS, DUSP6, TNFRSF1A, NFKB2, TAOK3, IL1B, GRB2, RAF1, MYD88, MAP3K11, ATF4, HSPA1A	535	300	8840	1.87265	0.165538	0.0030787	0.00208494
KEGG_PATHWAY	hsa04672:Intestinal immune network for IgA production	11	1.25142	0.00057482	CD86, HLA-DMA, HLA-DRB5, HLA-DMB, HLA-DPB1, HLA-DRA, LTBR, HLA-DRB1, TNFSF13B, HLA-DPA1, HLA-DQB1	535	49	8840	3.70933	0.165665	0.0030787	0.00208494
KEGG_PATHWAY	hsa05161:Hepatitis B	22	2.50284	0.00078225	MAP2K3, CDKN1A, JUN, MAP3K1, DDX3X, CXCL8, ATP6AP1, YWHAB, STAT1, STAT2, TYK2, FOS, NFKBIA, PTK2B, MAPK1, GRB2, STAT6, RAF1, BID, MYD88, ATF4, TLR2	535	163	8840	2.23015	0.218473	0.00411985	0.00279003
KEGG_PATHWAY	hsa04940:Type I diabetes mellitus	10	1.13766	0.000888462	CD86, HLA-DMA, HLA-DRB5, HLA-DMB, IL1B, HLA-DPB1, HLA-DRA, HLA-DRB1, HLA-DPA1, HLA-DQB1	535	43	8840	3.84264	0.244209	0.00460252	0.0031169
KEGG_PATHWAY	hsa05235:PD-L1 expression and PD-1 checkpoint pathway in cancer	15	1.70648	0.000931546	MAP2K3, MAP3K3, JUN, STAT1, IFNGR2, PTEN, FOS, NFKBIA, CD4, CSNK2B, MAPK1, PTPN6, RAF1, MYD88, TLR2	535	90	8840	2.75389	0.254406	0.00474788	0.00321534
KEGG_PATHWAY	hsa05332:Graft-versus-host disease	10	1.13766	0.0010583	CD86, HLA-DMA, HLA-DRB5, HLA-DMB, IL1B, HLA-DPB1, HLA-DRA, HLA-DRB1, HLA-DPA1, HLA-DQB1	535	44	8840	3.75531	0.283618	0.00530832	0.00359487
KEGG_PATHWAY	hsa05142:Chagas disease	16	1.82025	0.00124668	JUN, CXCL8, IFNGR2, CCL3L3, CFLAR, FOS, GNAI2, TNFRSF1A, NFKBIA, IL1B, GNAQ, CCL3, MAPK1, PLCB2, MYD88, TLR2	535	103	8840	2.56674	0.324938	0.00615551	0.0041686
KEGG_PATHWAY	hsa04210:Apoptosis	19	2.16155	0.00133092	JUN, BCL2A1, CTSZ, CFLAR, FOS, CTSS, TNFRSF1A, NFKBIA, TUBA1A, TNFSF10, CAPN2, CTSH, MAPK1, RAF1, BID, CTSD, CTSB, MCL1, ATF4	535	136	8840	2.30841	0.342638	0.00646112	0.00437557
KEGG_PATHWAY	hsa05203:Viral carcinogenesis	25	2.84414	0.00134947	YWHAE, CDKN1A, DDX3X, YWHAB, PXN, UBR4, CHD4, RBPJ, CDC42, MAPK1, RAC1, PRKACA, LYN, JUN, SYK, ACTN4, RHOA, NFKB2, NFKBIA, PKM, REL, GRB2, LTBR, ATP6V0D1, ATF4	535	205	8840	2.01504	0.346473	0.00646112	0.00437557
KEGG_PATHWAY	hsa04723:Retrograde endocannabinoid signaling	20	2.27531	0.00154824	NDUFA13, NDUFA11, NDUFA2, NDUFB2, NDUFA1, NDUFB1, NDUFC2, MT-ND2, MT-ND3, GNAI2, MT-ND1, GNG5, NDUFS7, NDUFS6, GNAQ, GNB2, GNB1, MAPK1, PRKACA, PLCB2	535	149	8840	2.2179	0.386192	0.00730215	0.00494512
KEGG_PATHWAY	hsa05330:Allograft rejection	9	1.02389	0.00164017	CD86, HLA-DMA, HLA-DRB5, HLA-DMB, HLA-DPB1, HLA-DRA, HLA-DRB1, HLA-DPA1, HLA-DQB1	535	38	8840	3.91343	0.403739	0.00762195	0.0051617
KEGG_PATHWAY	hsa04650:Natural killer cell mediated cytotoxicity	18	2.04778	0.0020452	FCER1G, SYK, IFNGR2, ITGB2, ITGAL, ICAM1, LAT2, PAK1, TYROBP, SH3BP2, TNFSF10, PTK2B, MAPK1, GRB2, PTPN6, RAC1, RAF1, BID	535	130	8840	2.28785	0.475284	0.00936644	0.00634309
KEGG_PATHWAY	hsa04066:HIF-1 signaling pathway	16	1.82025	0.00222104	CDKN1A, IFNGR2, CYBB, ENO1, RBX1, HK3, PFKL, EIF4EBP1, HMOX1, MAPK1, TIMP1, LTBR, ALDOA, EIF4E2, GAPDH, IL6R	535	109	8840	2.42545	0.503615	0.00996685	0.0067497
KEGG_PATHWAY	hsa04722:Neurotrophin signaling pathway	17	1.93402	0.00223939	YWHAE, MAP3K3, JUN, MAP3K1, PRKCD, RHOA, CDC42, NFKBIA, RPS6KA3, ARHGDIA, MAPK1, GRB2, RAC1, RAF1, SH2B3, CALM2, ATF4	535	120	8840	2.34081	0.506483	0.00996685	0.0067497
KEGG_PATHWAY	hsa05221:Acute myeloid leukemia	12	1.36519	0.00233157	CEBPA, CSF1R, SPI1, ITGAM, BCL2A1, RARA, EIF4EBP1, MAPK1, GRB2, CD14, RAF1, DUSP6	535	68	8840	2.91589	0.520639	0.010233	0.00692994
KEGG_PATHWAY	hsa05144:Malaria	10	1.13766	0.00270872	CXCL8, LRP1, IL1B, ITGB2, PECAM1, CD36, ITGAL, MYD88, ICAM1, TLR2	535	50	8840	3.30467	0.574463	0.0117254	0.00794063
KEGG_PATHWAY	hsa05205:Proteoglycans in cancer	24	2.73038	0.00275714	CD63, CDKN1A, ROCK1, PXN, PLAUR, MSN, IQGAP1, RHOA, CDC42, PPP1CB, PAK1, RRAS, FLNA, HCLS1, MAPK1, CTNNB1, GRB2, PTPN6, RAC1, ITGA5, RAF1, PRKACA, CD44, TLR2	535	204	8840	1.94393	0.580922	0.0117737	0.00797334
KEGG_PATHWAY	hsa05110:Vibrio cholerae infection	10	1.13766	0.00311739	ATP6V0B, ATP6V0E1, ATP6AP1, ATP6V1B2, TCIRG1, SEC61B, ATP6V1E1, ATP6V0D1, PRKACA, ATP6V1F	535	51	8840	3.23988	0.626004	0.0131346	0.00889495
KEGG_PATHWAY	hsa04611:Platelet activation	17	1.93402	0.00340316	LYN, VASP, FCER1G, SYK, ROCK1, RHOA, GNAI2, VAMP8, PPP1CB, FCGR2A, GNAQ, TBXAS1, MAPK1, TLN1, PRKACA, PLCB2, FERMT3	535	125	8840	2.24718	0.658301	0.01415	0.00958258
KEGG_PATHWAY	hsa05162:Measles	18	2.04778	0.00415759	JUN, STAT1, STAT2, MX2, TNFAIP3, MSN, ADAR, TYK2, FOS, NFKBIA, OAS1, IL1B, CSNK2B, CD46, BID, MYD88, HSPA1A, TLR2	535	139	8840	2.13972	0.730819	0.0170623	0.0115549
KEGG_PATHWAY	hsa04668:TNF signaling pathway	16	1.82025	0.00520022	MAP2K3, JUN, CEBPB, TNFAIP3, CFLAR, FOS, TNFRSF1B, ICAM1, TNFRSF1A, NFKBIA, RPS6KA4, IL1B, IRF1, MAPK1, JUNB, ATF4	535	119	8840	2.22163	0.806474	0.0210676	0.0142673
KEGG_PATHWAY	hsa04510:Focal adhesion	23	2.61661	0.00543408	VASP, JUN, ROCK1, PXN, PTEN, ACTN4, RHOA, CDC42, PPP1CB, DIAPH1, PAK1, PARVG, ZYX, CAPN2, FLNA, MAPK1, CTNNB1, GRB2, RAC1, ITGA5, RAF1, TLN1, PAK2	535	203	8840	1.87211	0.820288	0.0217363	0.0147202
KEGG_PATHWAY	hsa04613:Neutrophil extracellular trap formation	22	2.50284	0.00587354	SELPLG, ITGAM, SYK, NCF1, NCF2, ITGB2, NCF4, C5AR1, FPR1, CYBB, CYBA, ITGAL, FCGR2A, CLEC7A, CASP4, CASP1, PPIF, MAPK1, RAC1, RAF1, PLCB2, TLR2	535	192	8840	1.8933	0.843644	0.0232005	0.0157117
KEGG_PATHWAY	hsa00010:Glycolysis / Gluconeogenesis	11	1.25142	0.00654451	HK3, PFKL, PKM, TPI1, ALDH2, ADPGK, ALDH3B1, AKR1A1, ENO1, ALDOA, GAPDH	535	67	8840	2.71279	0.873599	0.0255317	0.0172904
KEGG_PATHWAY	hsa05200:Pathways in cancer	47	5.34699	0.00863915	NOTCH2, CEBPA, CSF1R, CDKN1A, SPI1, CSF3R, CXCL8, ROCK1, GSTP1, PTEN, MGST1, RASGRP4, GNAI2, CDC42, FRAT2, RXRA, GNG5, CTNNA1, HMOX1, MAPK1, STAT6, RAC1, BID, PRKACA, IL6R, IL13RA1, JUN, TPM3, GSTO1, STAT1, IFNGR2, STAT2, NCOA4, FOS, RHOA, NFKB2, RBX1, NFKBIA, GNAQ, GNB2, GNB1, RARA, CTNNB1, GRB2, RAF1, PLCB2, CALM2	535	533	8840	1.45703	0.934986	0.0332923	0.0225461
KEGG_PATHWAY	hsa05146:Amoebiasis	14	1.59272	0.00886266	ITGAM, RAB5C, CXCL8, ITGB2, CD1D, ACTN4, SERPINB6, IL1B, GNAQ, PRDX1, CD14, PRKACA, PLCB2, TLR2	535	103	8840	2.24589	0.939444	0.0337422	0.0228507
KEGG_PATHWAY	hsa00030:Pentose phosphate pathway	7	0.796359	0.00952741	G6PD, PFKL, TALDO1, PGLS, ALDOA, PGD, TKT	535	31	8840	3.73108	0.95098	0.0358412	0.0242722
KEGG_PATHWAY	hsa04520:Adherens junction	13	1.47895	0.00985388	ROCK1, WAS, ACTN4, IQGAP1, RHOA, CDC42, CSNK2B, CTNNA1, MAPK1, CTNNB1, PTPN6, RAC1, WASF2	535	93	8840	2.30972	0.955815	0.0364624	0.0246929
KEGG_PATHWAY	hsa01200:Carbon metabolism	15	1.70648	0.00992331	G6PD, TPI1, ADPGK, TALDO1, ENO1, PGD, HK3, PFKL, PKM, CAT, PGP, PGLS, ALDOA, TKT, GAPDH	535	116	8840	2.13664	0.95678	0.0364624	0.0246929
KEGG_PATHWAY	hsa04657:IL-17 signaling pathway	13	1.47895	0.0115969	JUN, CEBPB, JUND, CXCL8, TNFAIP3, FOS, IL17RA, NFKBIA, IL1B, FOSB, MAPK1, S100A9, S100A8	535	95	8840	2.26109	0.974635	0.0421222	0.0285258
KEGG_PATHWAY	hsa04216:Ferroptosis	8	0.910125	0.0120229	GPX4, FTH1, NCOA4, CYBB, HMOX1, SAT2, SAT1, FTL	535	42	8840	3.14731	0.977856	0.0431733	0.0292376
KEGG_PATHWAY	hsa05320:Autoimmune thyroid disease	9	1.02389	0.0134484	CD86, HLA-DMA, HLA-DRB5, HLA-DMB, HLA-DPB1, HLA-DRA, HLA-DRB1, HLA-DPA1, HLA-DQB1	535	53	8840	2.80585	0.985948	0.0472189	0.0319773
KEGG_PATHWAY	hsa04961:Endocrine and other factor-regulated calcium reabsorption	9	1.02389	0.0134484	GNAQ, AP2S1, CLTB, CLTA, AP2A1, ATP1B3, ATP2B1, PRKACA, PLCB2	535	53	8840	2.80585	0.985948	0.0472189	0.0319773
KEGG_PATHWAY	hsa05171:Coronavirus disease - COVID-19	24	2.73038	0.0170452	CFD, JUN, CXCL8, SYK, STAT1, STAT2, MX2, C5AR1, CYBB, ADAR, TYK2, FOS, TNFRSF1A, NFKBIA, RPS17, FCGR2A, OAS1, IL1B, CASP1, NLRP3, MAPK1, IL6R, MYD88, TLR2	535	238	8840	1.66622	0.995553	0.05919	0.0400844
KEGG_PATHWAY	hsa05165:Human papillomavirus infection	31	3.52673	0.0179876	NOTCH2, CDKN1A, PXN, PTEN, UBR4, CHD4, TCIRG1, RBPJ, CDC42, LFNG, EIF4EBP1, MAPK1, ATP6V1E1, PRKACA, ATP6V1F, ATP6V0B, ATP6V0E1, ATP6AP1, STAT1, STAT2, MX2, TYK2, TNFRSF1A, PKM, IRF1, ATP6V1B2, CTNNB1, GRB2, ITGA5, RAF1, ATP6V0D1	535	333	8840	1.53821	0.996713	0.0617836	0.0418408
KEGG_PATHWAY	hsa04933:AGE-RAGE signaling pathway in diabetic complications	13	1.47895	0.0182661	EGR1, JUN, CXCL8, STAT1, PRKCD, CYBB, ICAM1, CDC42, DIAPH1, IL1B, MAPK1, RAC1, PLCB2	535	101	8840	2.12677	0.996994	0.0620656	0.0420318
KEGG_PATHWAY	hsa04721:Synaptic vesicle cycle	11	1.25142	0.0199841	ATP6V0B, ATP6V0E1, AP2S1, CLTB, ATP6V1B2, CLTA, AP2A1, TCIRG1, ATP6V1E1, ATP6V0D1, ATP6V1F	535	79	8840	2.30072	0.998268	0.0671805	0.0454956
KEGG_PATHWAY	hsa04664:Fc epsilon RI signaling pathway	10	1.13766	0.022278	LYN, MAP2K3, FCER1G, SYK, ALOX5, INPP5D, MAPK1, GRB2, RAC1, RAF1	535	69	8840	2.39469	0.999172	0.0734965	0.0497729
KEGG_PATHWAY	hsa00480:Glutathione metabolism	9	1.02389	0.0223847	G6PD, GPX1, GPX4, GSTO1, ANPEP, GSTP1, MGST1, LAP3, PGD	535	58	8840	2.56397	0.9992	0.0734965	0.0497729
KEGG_PATHWAY	hsa04022:cGMP-PKG signaling pathway	18	2.04778	0.0225606	VASP, MEF2C, ROCK1, ATP1B3, IRS2, ATP2B1, RHOA, GNAI2, PPP1CB, RGS2, GNAQ, PPIF, MAPK1, RAF1, CALM2, PLCB2, ATF4, GTF2I	535	166	8840	1.79169	0.999244	0.0734965	0.0497729
KEGG_PATHWAY	hsa04921:Oxytocin signaling pathway	17	1.93402	0.023424	CDKN1A, JUN, MEF2C, ROCK1, FOS, RHOA, GNAI2, CAMKK2, PPP1CB, RGS2, MYL6, GNAQ, MAPK1, RAF1, PRKACA, CALM2, PLCB2	535	154	8840	1.82401	0.999428	0.0755306	0.0511504
KEGG_PATHWAY	hsa05211:Renal cell carcinoma	10	1.13766	0.0242505	CDC42, PAK1, CDKN1A, JUN, MAPK1, GRB2, RAC1, RAF1, PAK2, RBX1	535	70	8840	2.36048	0.999562	0.0771706	0.0522611
KEGG_PATHWAY	hsa04966:Collecting duct acid secretion	6	0.682594	0.0244211	ATP6V0E1, ATP6V1B2, TCIRG1, ATP6V1E1, ATP6V0D1, ATP6V1F	535	28	8840	3.54072	0.999585	0.0771706	0.0522611
KEGG_PATHWAY	hsa04148:Efferocytosis	17	1.93402	0.0260743	CX3CR1, CEBPB, RAB5C, LRP1, NR1H2, ADAM10, RXRA, ALOX5, STAB1, CASP1, PECAM1, SIRPA, MAPK1, PTPN6, CD36, RAC1, SGK1	535	156	8840	1.80062	0.999757	0.0815791	0.0552466
KEGG_PATHWAY	hsa04514:Cell adhesion molecules	17	1.93402	0.0274808	CD86, HLA-DRB5, SELPLG, ITGAM, ITGB2, ITGAL, ICAM1, HLA-DMA, VCAN, CD4, HLA-DMB, HLA-DPB1, PECAM1, HLA-DRA, HLA-DRB1, HLA-DPA1, HLA-DQB1	535	157	8840	1.78915	0.999846	0.0851365	0.0576557
KEGG_PATHWAY	hsa04150:mTOR signaling pathway	17	1.93402	0.028943	PTEN, RHOA, TNFRSF1A, RPS6KA3, ATP6V1B2, EIF4EBP1, MAPK1, GRB2, LAMTOR2, LAMTOR1, LAMTOR4, RAF1, SGK1, ATP6V1E1, EIF4E2, LAMTOR5, ATP6V1F	535	158	8840	1.77783	0.999904	0.088796	0.060134
KEGG_PATHWAY	hsa05160:Hepatitis C	17	1.93402	0.0304622	YWHAE, CDKN1A, YWHAB, STAT1, STAT2, MX2, TYK2, CFLAR, TNFRSF1A, NFKBIA, RXRA, OAS1, MAPK1, CTNNB1, GRB2, RAF1, BID	535	159	8840	1.76665	0.999941	0.0925583	0.0626819
KEGG_PATHWAY	hsa04071:Sphingolipid signaling pathway	14	1.59272	0.032324	ASAH1, FCER1G, ROCK1, PTEN, RHOA, GNAI2, TNFRSF1A, GNAQ, MAPK1, RAC1, RAF1, BID, CTSD, PLCB2	535	122	8840	1.89612	0.999968	0.096362	0.0652578
KEGG_PATHWAY	hsa04935:Growth hormone synthesis, secretion and action	14	1.59272	0.032324	MAP2K3, MAP3K1, STAT1, IRS2, FOS, GNAI2, GNAQ, MAPK1, GRB2, RAF1, PRKACA, JUNB, PLCB2, ATF4	535	122	8840	1.89612	0.999968	0.096362	0.0652578
KEGG_PATHWAY	hsa04260:Cardiac muscle contraction	11	1.25142	0.0362669	COX8A, COX7B, UQCRQ, TPM3, UQCRC1, ATP1B3, UQCR11, UQCR10, COX5B, COX5A, COX6B1	535	87	8840	2.08916	0.999991	0.107106	0.0725337
KEGG_PATHWAY	hsa04061:Viral protein interaction with cytokine and cytokine receptor	12	1.36519	0.0382903	CX3CR1, CSF1R, CXCL8, IL10RB, IL10RA, CCL3L3, TNFSF10, CCL3, LTBR, TNFRSF1B, IL6R, TNFRSF1A	535	100	8840	1.9828	0.999995	0.112035	0.0758716
KEGG_PATHWAY	hsa04910:Insulin signaling pathway	15	1.70648	0.0388277	INPPL1, IRS2, PYGL, PPP1CB, HK3, PRKAR1A, EIF4EBP1, FLOT2, MAPK1, GRB2, RAF1, EIF4E2, PRKACA, CALM2, RHOQ	535	138	8840	1.79602	0.999996	0.112565	0.0762306
KEGG_PATHWAY	hsa04915:Estrogen signaling pathway	15	1.70648	0.0408949	JUN, PRKCD, FOS, GNAI2, GNAQ, RARA, MAPK1, GRB2, RAF1, PRKACA, CALM2, CTSD, PLCB2, HSPA1A, ATF4	535	139	8840	1.7831	0.999998	0.11748	0.0795592
KEGG_PATHWAY	hsa05202:Transcriptional misregulation in cancer	19	2.16155	0.0435706	CD86, CEBPA, CSF1R, CDKN1A, MEF2C, CEBPB, SPI1, ITGAM, CXCL8, BCL2A1, LMO2, JMJD1C, DUSP6, LYL1, RXRA, NFKBIZ, REL, RARA, CD14	535	193	8840	1.62665	0.999999	0.124039	0.0840009
KEGG_PATHWAY	hsa04720:Long-term potentiation	9	1.02389	0.047716	PPP1CB, RPS6KA3, GNAQ, MAPK1, RAF1, PRKACA, PLCB2, CALM2, ATF4	535	67	8840	2.21956	1	0.134627	0.0911717
KEGG_PATHWAY	hsa04926:Relaxin signaling pathway	14	1.59272	0.0499787	JUN, FOS, ARRB2, GNAI2, NFKBIA, GNG5, GNB2, GNB1, MAPK1, GRB2, RAF1, PRKACA, PLCB2, ATF4	535	130	8840	1.77944	1	0.139763	0.0946499
KEGG_PATHWAY	hsa04141:Protein processing in endoplasmic reticulum	17	1.93402	0.0512525	PPP1R15A, PRKCSH, RPN1, SSR3, UBE2D1, CKAP4, UBE2J1, HERPUD1, RBX1, DNAJA1, OS9, CANX, CAPN2, SEC61B, P4HB, HSPA1A, ATF4	535	170	8840	1.65234	1	0.142068	0.0962108
KEGG_PATHWAY	hsa04936:Alcoholic liver disease	15	1.70648	0.0524093	MAP2K3, ACADVL, CXCL8, C5AR1, LY96, CAMKK2, IL17RA, TNFRSF1A, NFKBIA, ALDH2, IL1B, TRA2B, CTNNB1, CD14, MYD88	535	144	8840	1.72118	1	0.144012	0.0975269
KEGG_PATHWAY	hsa03050:Proteasome	7	0.796359	0.0568551	PSMB4, PSMA4, PSMB3, POMP, PSME2, PSMB10, PSMA7	535	46	8840	2.51443	1	0.154881	0.104888
KEGG_PATHWAY	hsa04623:Cytosolic DNA-sensing pathway	10	1.13766	0.0619992	PYCARD, NFKBIA, IFI16, IL1B, CASP1, POLR2E, NLRP3, ADAR, SAMHD1, POLR2L	535	83	8840	1.99077	1	0.167451	0.1134
KEGG_PATHWAY	hsa05230:Central carbon metabolism in cancer	9	1.02389	0.0633247	HK3, G6PD, PFKL, PKM, SCO2, PTEN, MAPK1, RAF1, SLC16A3	535	71	8840	2.09451	1	0.169581	0.114843
KEGG_PATHWAY	hsa04713:Circadian entrainment	11	1.25142	0.067268	PER1, GNG5, GNAQ, GNB2, GNB1, MAPK1, FOS, PRKACA, PLCB2, CALM2, GNAI2	535	97	8840	1.87378	1	0.178628	0.120969
KEGG_PATHWAY	hsa05216:Thyroid cancer	6	0.682594	0.0697695	CDKN1A, RXRA, TPM3, NCOA4, MAPK1, CTNNB1	535	37	8840	2.67946	1	0.183726	0.124422
KEGG_PATHWAY	hsa01230:Biosynthesis of amino acids	9	1.02389	0.0817824	PFKL, PKM, TPI1, TALDO1, ENO1, ALDOA, TKT, GLUL, GAPDH	535	75	8840	1.9828	1	0.213581	0.14464
KEGG_PATHWAY	hsa04015:Rap1 signaling pathway	19	2.16155	0.0898599	MAP2K3, VASP, CSF1R, ITGAM, ITGB2, FPR1, ITGAL, RHOA, GNAI2, CDC42, RRAS, GNAQ, MAPK1, CTNNB1, RAC1, RAF1, TLN1, CALM2, PLCB2	535	212	8840	1.48087	1	0.232752	0.157623

## Sheet: GSE245561-monocytes.1
Supplementary Tabel 5: KEGG analysis of highly expressed genes in monocytes
Category	Term		Count	%	PValue	Genes	List Total	Pop Hits	Pop Total	Fold Enrichment	Bonferroni	Benjamini	FDR
KEGG_PATHWAY	hsa04510	Focal adhesion	35	8.88325	2.10614e-19	ITGB1, ROCK2, LAMA4, PTEN, PDGFA, LAMC1, MYL12A, MYLK, IBSP, FLNA, ITGAV, PDGFRB, JUN, PPP1R12A, LAMB2, CAV2, ACTN1, CAV1, ITGA1, FN1, LAMB1, PARVA, PGF, PTK2, COL1A1, COL1A2, COL4A2, COL4A1, COL6A2, COL6A1, COL6A3, PPP1R12B, DOCK1, MYL9, VCL	219	203	8840	6.95953	5.1811e-17	5.20217e-17	4.23334e-17
KEGG_PATHWAY	hsa04820	Cytoskeleton in muscle cells	29	7.36041	2.19202e-12	ITGB1, SDC2, NID1, PDLIM3, CSRP2, LMNA, ITGAV, PDLIM5, TPM4, COL24A1, TPM2, TPM1, ITGA1, FN1, BGN, COL1A1, COL3A1, COL1A2, COL4A2, COL5A1, COL4A1, COL6A2, COL5A2, COL6A1, COL6A3, MYH9, VIM, MYL9, VCL	219	232	8840	5.04566	5.39238e-10	2.70715e-10	2.20298e-10
KEGG_PATHWAY	hsa04512	ECM-receptor interaction	17	4.31472	3.87798e-10	ITGB1, LAMB2, LAMA4, ITGA1, FN1, LAMB1, LAMC1, COL1A1, COL1A2, COL4A2, IBSP, COL4A1, COL6A2, COL6A1, COL6A3, ITGAV, CD36	219	89	8840	7.71023	9.53983e-08	2.90213e-08	2.36165e-08
KEGG_PATHWAY	hsa05165	Human papillomavirus infection	31	7.86802	5.71489e-10	ITGB1, NOTCH3, LAMA4, PTEN, PARD6G, LAMC1, IBSP, CREB3L2, ITGAV, HES4, MAGI1, PDGFRB, ATP6V1G1, JAG1, LAMB2, ITGA1, FN1, HLA-B, LAMB1, HLA-A, PTK2, COL1A1, HEYL, COL1A2, COL4A2, COL4A1, COL6A2, PARD3, COL6A1, GNAS, COL6A3	219	333	8840	3.75773	1.40586e-07	2.90213e-08	2.36165e-08
KEGG_PATHWAY	hsa04270	Vascular smooth muscle contraction	20	5.07614	5.87475e-10	GUCY1A2, PPP1R14A, GUCY1A1, ARHGEF12, GUCY1B1, PPP1R12A, ROCK2, CACNA1C, ADRA1B, MYLK, ACTA2, EDNRA, MYL6, CALD1, GNAS, MYH9, PPP1R12B, CALM2, MYL9, PRKG1	219	134	8840	6.02467	1.44519e-07	2.90213e-08	2.36165e-08
KEGG_PATHWAY	hsa05146	Amoebiasis	16	4.06091	2.80892e-08	TGFB3, LAMB2, LAMA4, ACTN1, FN1, HSPB1, LAMB1, LAMC1, PTK2, COL1A1, COL3A1, COL1A2, COL4A2, COL4A1, GNAS, VCL	219	103	8840	6.27034	6.90992e-06	1.15634e-06	9.40988e-07
KEGG_PATHWAY	hsa04022	cGMP-PKG signaling pathway	19	4.82234	1.23365e-07	GUCY1A2, GUCY1A1, MEF2C, GUCY1B1, PPP1R12A, TRPC6, KCNJ8, ROCK2, NFATC2, CACNA1C, ADRA1B, MYLK, EDNRA, CREB3L2, PDE3A, SLC25A5, CALM2, MYL9, PRKG1	219	166	8840	4.62012	3.03474e-05	4.35303e-06	3.54234e-06
KEGG_PATHWAY	hsa04921	Oxytocin signaling pathway	18	4.56853	2.16073e-07	GUCY1A2, GUCY1A1, JUN, MEF2C, GUCY1B1, PPP1R12A, ROCK2, CACNA2D1, NFATC2, CACNA1C, FOS, MYLK, CACNB2, MYL6, GNAS, PPP1R12B, CALM2, MYL9	219	154	8840	4.71802	5.31527e-05	6.67127e-06	5.42885e-06
KEGG_PATHWAY	hsa05020	Prion disease	23	5.83756	1.25689e-06	EGR1, HSPA5, MT-CO1, CAV2, CAV1, TUBB, COX4I2, NDUFA4L2, ATP5MC3, CACNA1C, LAMC1, TUBB4B, COX6A1, PSMA7, UQCRH, SEM1, TUBA1A, PSMB5, CREB3L2, MT-CO2, MT-CO3, SLC25A5, MT-CYB	219	278	8840	3.33957	0.000309148	3.21155e-05	2.61345e-05
KEGG_PATHWAY	hsa04260	Cardiac muscle contraction	13	3.29949	1.30022e-06	TPM4, MT-CO1, TPM2, CACNA2D1, TPM1, COX4I2, CACNA1C, COX6A1, UQCRH, CACNB2, MT-CO2, MT-CO3, MT-CYB	219	87	8840	6.0316	0.000319804	3.21155e-05	2.61345e-05
KEGG_PATHWAY	hsa05418	Fluid shear stress and atherosclerosis	16	4.06091	1.83754e-06	JUN, MEF2C, HSP90AA1, CAV2, MGST3, SDC2, CAV1, PDGFA, PLAT, FOS, MMP9, PTK2, SUMO2, ITGAV, CALM2, SQSTM1	219	141	8840	4.58046	0.000451933	4.12611e-05	3.35768e-05
KEGG_PATHWAY	hsa05200	Pathways in cancer	33	8.37563	2.24238e-06	ITGB1, NOTCH3, CTBP2, ROCK2, EPAS1, LAMA4, MGST3, PTEN, PDGFA, LAMC1, EDNRA, CTNNA1, ITGAV, CTNNA3, PDGFRB, JUN, HSP90AA1, ARHGEF12, JAG1, TGFB3, LAMB2, FN1, LAMB1, FOS, MMP9, PGF, PTK2, RUNX1, HEYL, COL4A2, COL4A1, GNAS, CALM2	219	533	8840	2.49916	0.000551473	4.61556e-05	3.75598e-05
KEGG_PATHWAY	hsa04151	PI3K-Akt signaling pathway	26	6.59898	2.82308e-06	ITGB1, LAMA4, PTEN, PDGFA, LAMC1, IBSP, CREB3L2, ITGAV, MAGI1, PDGFRB, HSP90AA1, ANGPT2, LAMB2, ITGA1, FN1, LAMB1, PGF, PTK2, COL1A1, NR4A1, COL1A2, COL4A2, COL4A1, COL6A2, COL6A1, COL6A3	219	362	8840	2.89916	0.000694238	5.36386e-05	4.36492e-05
KEGG_PATHWAY	hsa04810	Regulation of actin cytoskeleton	20	5.07614	3.69141e-06	PDGFRB, ITGB1, ARHGEF12, PPP1R12A, ROCK2, ACTN1, ITGA1, FN1, PDGFA, MYL12A, PTK2, MYLK, ARPC2, MYH9, ITGAV, ARHGEF7, PPP1R12B, DOCK1, MYL9, VCL	219	230	8840	3.51003	0.000907676	6.5127e-05	5.29981e-05
KEGG_PATHWAY	hsa05012	Parkinson disease	21	5.32995	1.12197e-05	HSPA5, MT-CO1, TUBB, COX4I2, NDUFA4L2, ATP5MC3, PARK7, TUBB4B, COX6A1, PSMA7, UQCRH, SEM1, TUBA1A, PSMB5, UBB, GNAS, MT-CO2, MT-CO3, SLC25A5, MT-CYB, CALM2	219	271	8840	3.12794	0.00275625	0.000169893	0.000138253
KEGG_PATHWAY	hsa04611	Platelet activation	14	3.5533	1.16761e-05	ITGB1, GUCY1A2, GUCY1A1, ARHGEF12, GUCY1B1, PPP1R12A, ROCK2, MYL12A, MYLK, COL1A1, COL3A1, COL1A2, GNAS, PRKG1	219	125	8840	4.52091	0.00286821	0.000169893	0.000138253
KEGG_PATHWAY	hsa05415	Diabetic cardiomyopathy	18	4.56853	1.1693e-05	MT-CO1, TGFB3, COX4I2, PTEN, NDUFA4L2, ATP5MC3, COX6A1, MMP9, UQCRH, COL1A1, COL3A1, COL1A2, MT-CO2, MT-CO3, CD36, SLC25A5, MT-CYB, GAPDH	219	205	8840	3.54427	0.00287237	0.000169893	0.000138253
KEGG_PATHWAY	hsa04530	Tight junction	16	4.06091	1.8491e-05	MAGI1, ITGB1, JUN, ROCK2, ACTN1, PARD6G, ARHGAP17, MYL12A, RUNX1, MYL6, TUBA1A, ARPC2, PARD3, MYH9, RAPGEF2, MYL9	219	170	8840	3.79909	0.0045385	0.000253738	0.000206483
KEGG_PATHWAY	hsa05100	Bacterial invasion of epithelial cells	11	2.79188	1.96701e-05	ITGB1, ARPC2, CAV2, CAV1, CTNNA1, FN1, CTNNA3, DOCK1, PTK2, VCL, SEPTIN11	219	78	8840	5.69254	0.00482722	0.000255712	0.000208089
KEGG_PATHWAY	hsa05205	Proteoglycans in cancer	17	4.31472	4.19797e-05	ITGB1, CD63, DDX5, ARHGEF12, PPP1R12A, ROCK2, CAV2, SDC2, CAV1, FN1, MMP9, PTK2, COL1A1, COL1A2, FLNA, ITGAV, PPP1R12B	219	204	8840	3.36377	0.0102741	0.000518449	0.000421896
KEGG_PATHWAY	hsa05414	Dilated cardiomyopathy	12	3.04569	5.19589e-05	ITGB1, CACNB2, TPM4, TGFB3, TPM2, CACNA2D1, TPM1, LMNA, ITGA1, GNAS, ITGAV, CACNA1C	219	105	8840	4.61318	0.0127009	0.000583357	0.000474716
KEGG_PATHWAY	hsa04974	Protein digestion and absorption	12	3.04569	5.19589e-05	COL1A1, COL18A1, COL3A1, COL1A2, COL4A2, COL5A1, COL24A1, COL4A1, COL6A2, COL5A2, COL6A1, COL6A3	219	105	8840	4.61318	0.0127009	0.000583357	0.000474716
KEGG_PATHWAY	hsa05222	Small cell lung cancer	11	2.79188	9.15169e-05	ITGB1, COL4A2, COL4A1, LAMB2, LAMA4, PTEN, FN1, ITGAV, LAMB1, LAMC1, PTK2	219	93	8840	4.77439	0.0222626	0.000982812	0.000799778
KEGG_PATHWAY	hsa04670	Leukocyte transendothelial migration	12	3.04569	0.000129324	ITGB1, ROCK2, ACTN1, CTNNA1, CTNNA3, THY1, MYL9, MMP9, MYL12A, PTK2, VCL, CD99	219	116	8840	4.17572	0.031315	0.00133096	0.00108309
KEGG_PATHWAY	hsa05410	Hypertrophic cardiomyopathy	11	2.79188	0.000155164	ITGB1, CACNB2, TPM4, TGFB3, TPM2, CACNA2D1, TPM1, LMNA, ITGA1, ITGAV, CACNA1C	219	99	8840	4.48503	0.037454	0.00153302	0.00124752
KEGG_PATHWAY	hsa04360	Axon guidance	15	3.80711	0.000177573	ITGB1, SEMA5A, ARHGEF12, TRPC6, ROCK2, TRPC4, NFATC2, PARD6G, UNC5C, MYL12A, PTK2, PARD3, NCK2, MYL9, EPHA3	219	184	8840	3.29065	0.0427462	0.00168694	0.00137277
KEGG_PATHWAY	hsa04924	Renin secretion	9	2.28426	0.00027581	GUCY1A2, EDNRA, GUCY1A1, GUCY1B1, PDE1A, PDE3A, GNAS, CACNA1C, CALM2	219	69	8840	5.26504	0.0656074	0.00252315	0.00205325
KEGG_PATHWAY	hsa04540	Gap junction	10	2.53807	0.0004212	PDGFRB, GUCY1A2, GUCY1A1, TUBA1A, GUCY1B1, TUBB, GNAS, PDGFA, TUBB4B, PRKG1	219	92	8840	4.38753	0.0984475	0.00371558	0.00302361
KEGG_PATHWAY	hsa04520	Adherens junction	10	2.53807	0.000456523	SMURF1, ROCK2, PARD3, ACTN1, CTNNA1, ARHGAP29, CTNNA3, MYL9, MYL12A, VCL	219	93	8840	4.34035	0.106251	0.00388832	0.00316418
KEGG_PATHWAY	hsa05016	Huntington disease	19	4.82234	0.000656825	HIP1, MT-CO1, TUBB, COX4I2, NDUFA4L2, ATP5MC3, TUBB4B, COX6A1, PSMA7, UQCRH, SEM1, TUBA1A, PSMB5, CREB3L2, AP2S1, MT-CO2, MT-CO3, SLC25A5, MT-CYB	219	311	8840	2.46605	0.149246	0.00540786	0.00440073
KEGG_PATHWAY	hsa05022	Pathways of neurodegeneration - multiple diseases	25	6.34518	0.000800111	HIP1, MT-CO1, COX4I2, NDUFA4L2, ATP5MC3, CACNA1C, PARK7, COX6A1, UQCRH, PSMA7, MAP1LC3A, TUBA1A, PSMB5, UBB, HSPA5, TUBB, CSNK1E, TUBB4B, SEM1, MT-CO2, MT-CO3, SLC25A5, MT-CYB, CALM2, SQSTM1	219	483	8840	2.0893	0.178732	0.00637508	0.00518782
KEGG_PATHWAY	hsa04814	Motor proteins	14	3.5533	0.00115425	TPM4, TPM2, TUBB, TPM1, TUBB4B, DYNLL1, MYL12A, ACTA2, MYO1B, MYL6, TUBA1A, KIF26B, MYH9, MYL9	219	197	8840	2.8686	0.247316	0.00890936	0.00725013
KEGG_PATHWAY	hsa05412	Arrhythmogenic right ventricular cardiomyopathy	9	2.28426	0.00122369	ITGB1, CACNB2, CACNA2D1, LMNA, ITGA1, CTNNA1, ITGAV, CTNNA3, CACNA1C	219	86	8840	4.22428	0.260079	0.00899497	0.00731979
KEGG_PATHWAY	hsa05131	Shigellosis	16	4.06091	0.00123817	ITGB1, JUN, ROCK2, ACTN1, MYL12A, SEPTIN11, PTK2, SEPTIN7, CYTH3, MAP1LC3A, UBB, ARPC2, DOCK1, SQSTM1, MYL9, VCL	219	249	8840	2.59375	0.262714	0.00899497	0.00731979
KEGG_PATHWAY	hsa04926	Relaxin signaling pathway	11	2.79188	0.0013675	ACTA2, COL1A1, COL3A1, JUN, COL1A2, COL4A2, COL4A1, CREB3L2, GNAS, FOS, MMP9	219	130	8840	3.41553	0.28583	0.00950505	0.00773488
KEGG_PATHWAY	hsa05208	Chemical carcinogenesis - reactive oxygen species	15	3.80711	0.00138535	JUN, MT-CO1, MGST3, COX4I2, PTEN, NDUFA4L2, ATP5MC3, FOS, COX6A1, PTK2, UQCRH, MT-CO2, MT-CO3, SLC25A5, MT-CYB	219	226	8840	2.67911	0.288964	0.00950505	0.00773488
KEGG_PATHWAY	hsa05130	Pathogenic Escherichia coli infection	14	3.5533	0.00151569	ITGB1, JUN, ARHGEF12, ROCK2, TUBB, FOS, TUBB4B, CYTH3, MYO1B, TUBA1A, ARPC2, NCK2, MYH9, GAPDH	219	203	8840	2.78381	0.311433	0.0101183	0.0082339
KEGG_PATHWAY	hsa05135	Yersinia infection	11	2.79188	0.00213993	ITGB1, JUN, ARHGEF12, ARPC2, ROCK2, FN1, NFATC2, FOS, ARHGEF7, DOCK1, PTK2	219	138	8840	3.21752	0.409618	0.0139095	0.0113191
KEGG_PATHWAY	hsa04713	Circadian entrainment	9	2.28426	0.00264629	GUCY1A2, GUCY1A1, RASD1, GUCY1B1, GNAS, FOS, CACNA1C, CALM2, PRKG1	219	97	8840	3.74523	0.478919	0.0167598	0.0136386
KEGG_PATHWAY	hsa04010	MAPK signaling pathway	17	4.31472	0.00304924	PDGFRB, JUN, MEF2C, ANGPT2, TGFB3, CACNA2D1, PDGFA, HSPB1, CACNA1C, FOS, PGF, CACNB2, NR4A1, MAP3K20, NF1, FLNA, RAPGEF2	219	300	8840	2.28737	0.528227	0.018829	0.0153224
KEGG_PATHWAY	hsa04933	AGE-RAGE signaling pathway in diabetic complications	9	2.28426	0.00340337	COL1A1, EGR1, COL3A1, JUN, COL1A2, COL4A2, COL4A1, TGFB3, FN1	219	101	8840	3.59691	0.567709	0.0205032	0.0166848
KEGG_PATHWAY	hsa05010	Alzheimer disease	20	5.07614	0.00357336	MT-CO1, TUBB, COX4I2, NDUFA4L2, ATP5MC3, CACNA1C, CSNK1E, TUBB4B, COX6A1, PSMA7, UQCRH, SEM1, TUBA1A, PSMB5, MT-CO2, MT-CO3, SLC25A5, MT-CYB, GAPDH, CALM2	219	391	8840	2.06472	0.585474	0.0210147	0.0171011
KEGG_PATHWAY	hsa05014	Amyotrophic lateral sclerosis	19	4.82234	0.00465482	HSPA5, MT-CO1, TUBB, COX4I2, NDUFA4L2, ATP5MC3, TUBB4B, COX6A1, PSMA7, UQCRH, SEM1, TUBA1A, MAP1LC3A, PSMB5, NRG3, MT-CO2, MT-CO3, MT-CYB, SQSTM1	219	371	8840	2.06723	0.682653	0.0267382	0.0217586
KEGG_PATHWAY	hsa04145	Phagosome	11	2.79188	0.00540934	ITGB1, MRC2, ATP6V1G1, TUBA1A, TUBB, HLA-B, ITGAV, HLA-A, CD36, CALR, TUBB4B	219	157	8840	2.82814	0.73666	0.0303661	0.0247109
KEGG_PATHWAY	hsa00190	Oxidative phosphorylation	10	2.53807	0.00702434	ATP6V1G1, MT-CO1, COX4I2, NDUFA4L2, ATP5MC3, MT-CO2, MT-CO3, MT-CYB, COX6A1, UQCRH	219	138	8840	2.92502	0.823438	0.0385558	0.0313754
KEGG_PATHWAY	hsa04371	Apelin signaling pathway	10	2.53807	0.00769614	ACTA2, NOTCH3, EGR1, MEF2C, JAG1, MAP1LC3A, PLAT, CCN2, CALM2, MYLK	219	140	8840	2.88324	0.850517	0.0413249	0.0336288
KEGG_PATHWAY	hsa05132	Salmonella infection	14	3.5533	0.00919333	JUN, HSP90AA1, ROCK2, TUBB, FOS, TUBB4B, DYNLL1, MYL12A, CYTH3, TUBA1A, ARPC2, FLNA, GAPDH, MYL9	219	251	8840	2.25145	0.896896	0.0483139	0.0393162
KEGG_PATHWAY	hsa04144	Endocytosis	14	3.5533	0.0094252	SMURF1, CAV2, CAV1, HLA-B, PARD6G, AGAP1, CBLB, ASAP1, HLA-A, CYTH3, GRK5, ARPC2, PARD3, AP2S1	219	252	8840	2.24252	0.902665	0.0485005	0.039468
KEGG_PATHWAY	hsa05215	Prostate cancer	8	2.03046	0.0104652	PDGFRB, HSP90AA1, ZEB1, CREB3L2, PTEN, PDGFA, PLAT, MMP9	219	98	8840	3.29513	0.924829	0.0527529	0.0429285
KEGG_PATHWAY	hsa04261	Adrenergic signaling in cardiomyocytes	10	2.53807	0.0138619	CACNB2, TPM4, TPM2, CACNA2D1, TPM1, CREB3L2, GNAS, CACNA1C, ADRA1B, CALM2	219	154	8840	2.62112	0.967739	0.0684778	0.0557248
KEGG_PATHWAY	hsa04932	Non-alcoholic fatty liver disease	10	2.53807	0.015559	JUN, MT-CO1, COX4I2, NDUFA4L2, MT-CO2, FOS, MT-CO3, MT-CYB, COX6A1, UQCRH	219	157	8840	2.57104	0.978881	0.0753542	0.0613206
KEGG_PATHWAY	hsa04024	cAMP signaling pathway	12	3.04569	0.024108	EDNRA, JUN, PPP1R12A, PDE10A, ROCK2, CREB3L2, PDE3A, GNAS, FOS, CACNA1C, CALM2, MYL9	219	226	8840	2.14329	0.997529	0.112352	0.0914284
KEGG_PATHWAY	hsa05163	Human cytomegalovirus infection	12	3.04569	0.024108	PDIA3, ARHGEF12, ROCK2, CREB3L2, HLA-B, GNAS, NFATC2, ITGAV, HLA-A, CALR, CALM2, PTK2	219	226	8840	2.14329	0.997529	0.112352	0.0914284
KEGG_PATHWAY	hsa05031	Amphetamine addiction	6	1.52284	0.0273457	JUN, CREB3L2, GNAS, FOS, CACNA1C, CALM2	219	69	8840	3.51003	0.998909	0.125081	0.101787
KEGG_PATHWAY	hsa04714	Thermogenesis	12	3.04569	0.0308214	MT-CO1, CREB3L2, COX4I2, NDUFA4L2, GNAS, ATP5MC3, MT-CO2, MT-CO3, MT-CYB, COX6A1, PRKG1, UQCRH	219	235	8840	2.06121	0.999548	0.138416	0.112638
KEGG_PATHWAY	hsa04970	Salivary secretion	7	1.77665	0.0324346	GUCY1A2, GUCY1A1, GUCY1B1, GNAS, ADRA1B, CALM2, PRKG1	219	97	8840	2.91296	0.9997	0.14306	0.116417
KEGG_PATHWAY	hsa01522	Endocrine resistance	7	1.77665	0.0353406	NOTCH3, JUN, JAG1, GNAS, FOS, MMP9, PTK2	219	99	8840	2.85411	0.999857	0.153143	0.124622
KEGG_PATHWAY	hsa04015	Rap1 signaling pathway	11	2.79188	0.0369655	MAGI1, PDGFRB, ITGB1, ANGPT2, PARD3, GNAS, PDGFA, PARD6G, RAPGEF2, CALM2, PGF	219	212	8840	2.09443	0.999905	0.157422	0.128105
KEGG_PATHWAY	hsa04514	Cell adhesion molecules	9	2.28426	0.0402975	ITGB1, CADM1, SDC2, HLA-B, NRXN3, ITGAV, HLA-A, CD99, CD276	219	157	8840	2.31393	0.99996	0.165892	0.134997
KEGG_PATHWAY	hsa04218	Cellular senescence	9	2.28426	0.0402975	TGFB3, PTEN, HLA-B, NFATC2, HLA-A, SLC25A5, CALM2, SQSTM1, HIPK2	219	157	8840	2.31393	0.99996	0.165892	0.134997
KEGG_PATHWAY	hsa04612	Antigen processing and presentation	6	1.52284	0.0472206	PDIA3, HSP90AA1, HSPA5, HLA-B, HLA-A, CALR	219	80	8840	3.0274	0.999993	0.191205	0.155596
KEGG_PATHWAY	hsa05166	Human T-cell leukemia virus 1 infection	11	2.79188	0.0492153	EGR1, JUN, TGFB3, CREB3L2, PTEN, HLA-B, NFATC2, HLA-A, FOS, CALR, SLC25A5	219	223	8840	1.99111	0.999996	0.196067	0.159553
KEGG_PATHWAY	hsa04915	Estrogen signaling pathway	8	2.03046	0.0560518	HSP90AA1, JUN, KRT18, CREB3L2, GNAS, FOS, CALM2, MMP9	219	139	8840	2.32318	0.999999	0.219759	0.178832
KEGG_PATHWAY	hsa04730	Long-term depression	5	1.26904	0.0601355	GUCY1A2, GUCY1A1, GUCY1B1, GNAS, PRKG1	219	60	8840	3.36377	1	0.232086	0.188863
KEGG_PATHWAY	hsa04330	Notch signaling pathway	5	1.26904	0.0662782	NOTCH3, HEYL, TLE1, JAG1, CTBP2	219	62	8840	3.25527	1	0.251857	0.204953
KEGG_PATHWAY	hsa04912	GnRH signaling pathway	6	1.52284	0.0794444	EGR1, MMP14, JUN, GNAS, CACNA1C, CALM2	219	93	8840	2.60421	1	0.2971	0.24177
KEGG_PATHWAY	hsa05170	Human immunodeficiency virus 1 infection	10	2.53807	0.08059	PDIA3, BST2, JUN, HLA-B, NFATC2, HLA-A, FOS, CALR, CALM2, PTK2	219	213	8840	1.89508	1	0.2971	0.24177
KEGG_PATHWAY	hsa05417	Lipid and atherosclerosis	10	2.53807	0.0868248	HSP90AA1, JUN, HSPA5, ROCK2, NFATC2, FOS, CD36, CALM2, MMP9, PTK2	219	216	8840	1.86876	1	0.315378	0.256644
KEGG_PATHWAY	hsa04148	Efferocytosis	8	2.03046	0.0909173	BSG, NFATC2, ITGAV, CD36, CALR, MFGE8, DOCK1, PTK2	219	156	8840	2.07002	1	0.325458	0.264846
KEGG_PATHWAY	hsa00230	Purine metabolism	7	1.77665	0.0964434	GUCY1A2, GUCY1A1, GUCY1B1, PDE10A, PDE1A, PDE3A, NME2	219	128	8840	2.20748	1	0.340061	0.27673
KEGG_PATHWAY	hsa04020	Calcium signaling pathway	11	2.79188	0.0977504	PDGFRB, EDNRA, PDE1A, GNAS, PDGFA, NFATC2, CACNA1C, ADRA1B, SLC25A5, CALM2, MYLK	219	254	8840	1.7481	1	0.340061	0.27673

## Sheet: GSE245561-monocytes.2
Supplementary Tabel 5: KEGG analysis of highly expressed genes in monocytes
Category	Term		Count	%	PValue	Genes	List Total	Pop Hits	Pop Total	Fold Enrichment	Bonferroni	Benjamini	FDR
KEGG_PATHWAY	hsa05152	Tuberculosis	38	5.27046	1.37936e-14	CEBPB, CIITA, ITGB2, MALT1, CTSS, C3, PPP3R1, HLA-DMA, FCGR3A, HLA-DMB, CLEC7A, MRC1, ITGAX, CD14, FCGR1A, HLA-DOA, CTSD, HLA-DQA2, HLA-DQA1, ATP6V0A1, HLA-DPA1, CD74, ATP6V0B, HLA-DRB5, FCER1G, SYK, APAF1, IFNGR1, RIPK2, IFNGR2, NFKB1, FCGR2A, HLA-DPB1, HLA-DRA, ATP6V0C, HLA-DRB1, HLA-DQB1, TLR2	418	180	8840	4.46465	4.2264e-12	4.24842e-12	3.47598e-12
KEGG_PATHWAY	hsa04145	Phagosome	35	4.85437	3.39238e-14	TFRC, NCF4, ITGB2, CTSS, C3, HLA-DMA, FCGR3A, HLA-DMB, CLEC7A, CTSL, MRC1, CD14, FCGR1A, HLA-DOA, HLA-DQA2, ATP6V1C1, HLA-DQA1, ATP6V0A1, HLA-DPA1, MSR1, ATP6V0B, HLA-DRB5, STX7, CYBB, CYBA, HLA-E, PIKFYVE, FCGR2A, ATP6V1B2, HLA-DPB1, HLA-DRA, ATP6V0C, HLA-DRB1, HLA-DQB1, TLR2	418	157	8840	4.71459	1.04297e-11	5.22427e-12	4.2744e-12
KEGG_PATHWAY	hsa05140	Leishmaniasis	24	3.32871	3.9602e-13	HLA-DRB5, IFNGR1, IFNGR2, ITGB2, NCF4, CYBB, CYBA, FOS, NFKB1, C3, HLA-DMA, FCGR3A, FCGR2A, HLA-DMB, HLA-DPB1, HLA-DRA, FCGR1A, HLA-DOA, HLA-DQA2, HLA-DQA1, HLA-DRB1, HLA-DPA1, HLA-DQB1, TLR2	418	77	8840	6.59169	1.21577e-10	4.06581e-11	3.32657e-11
KEGG_PATHWAY	hsa05150	Staphylococcus aureus infection	26	3.6061	3.14367e-12	C1QB, CFD, C1QA, C5AR1, ITGB2, FPR1, FPR3, C2, ICAM1, C3, HLA-DMA, FCGR3A, HLA-DMB, C3AR1, FCGR1A, HLA-DOA, HLA-DQA2, HLA-DQA1, HLA-DPA1, HLA-DRB5, FCGR2A, HLA-DPB1, HLA-DRA, HLA-DRB1, C1QC, HLA-DQB1	418	100	8840	5.49856	9.65118e-10	2.42062e-10	1.98051e-10
KEGG_PATHWAY	hsa05323	Rheumatoid arthritis	25	3.46741	5.28612e-12	CD86, ITGB2, TNFSF13B, ICAM1, HLA-DMA, HLA-DMB, CTSL, HLA-DOA, HLA-DQA2, ATP6V1C1, HLA-DQA1, ATP6V0A1, HLA-DPA1, ATP6V0B, HLA-DRB5, TNFSF13, FOS, VEGFA, ATP6V1B2, HLA-DPB1, HLA-DRA, ATP6V0C, HLA-DRB1, HLA-DQB1, TLR2	418	94	8840	5.62455	1.62283e-09	3.25625e-10	2.66421e-10
KEGG_PATHWAY	hsa04142	Lysosome	29	4.02219	1.1433e-11	ASAH1, HEXB, HEXA, LITAF, GNS, CTSS, CTSL, PSAP, CTSD, CTSC, ATP6V0A1, CTSB, HGSNAT, ATP6V0B, MANBA, SLC11A1, GAA, AP1B1, LAPTM5, NAGA, SUMF1, NPC2, DMXL2, PPT1, MAN2B1, TPP1, CD68, ATP6V0C, LGMN	418	132	8840	4.64622	3.50992e-09	5.86892e-10	4.80184e-10
KEGG_PATHWAY	hsa04658	Th1 and Th2 cell differentiation	24	3.32871	2.37188e-11	NOTCH2, HLA-DRB5, MAML2, IFNGR1, IFNGR2, FOS, RBPJ, NFKB1, HLA-DMA, CD4, PPP3R1, HLA-DMB, MAF, IL2RA, HLA-DPB1, STAT4, HLA-DRA, MAML3, HLA-DOA, HLA-DQA2, HLA-DQA1, HLA-DRB1, HLA-DPA1, HLA-DQB1	418	92	8840	5.51695	7.28167e-09	1.04363e-09	8.53878e-10
KEGG_PATHWAY	hsa04380	Osteoclast differentiation	27	3.7448	1.88846e-09	CSF1R, SPI1, NCF4, ITPR2, TREM2, PIK3R1, PPP3R1, FCGR3A, SIRPA, FCGR1A, JUNB, IFNAR2, MAP2K1, SYK, IFNGR1, IFNGR2, MITF, CYBA, FOS, GAB2, TGFBR1, NFKB1, FOSL2, TYROBP, FCGR2A, GRB2, LCP2	418	142	8840	4.02116	5.79757e-07	7.27057e-08	5.94865e-08
KEGG_PATHWAY	hsa04612	Antigen processing and presentation	20	2.77393	3.40151e-09	CD74, CIITA, HLA-DRB5, IFI30, CTSS, HLA-E, HLA-DMA, CD4, HLA-DMB, CTSL, HLA-DPB1, HLA-DRA, HLA-DOA, HLA-DQA2, HLA-DQA1, HLA-DRB1, CTSB, HLA-DPA1, LGMN, HLA-DQB1	418	80	8840	5.28708	1.04426e-06	1.16407e-07	9.52423e-08
KEGG_PATHWAY	hsa04659	Th17 cell differentiation	23	3.19001	4.34542e-09	HLA-DRB5, IFNGR1, IFNGR2, STAT3, IL1RAP, FOS, HIF1A, TGFBR1, NFKB1, RUNX1, HLA-DMA, CD4, PPP3R1, HLA-DMB, IL2RA, HLA-DPB1, HLA-DRA, HLA-DOA, HLA-DQA2, HLA-DQA1, HLA-DRB1, HLA-DPA1, HLA-DQB1	418	108	8840	4.50381	1.33404e-06	1.32723e-07	1.08591e-07
KEGG_PATHWAY	hsa05321	Inflammatory bowel disease	18	2.49653	4.7401e-09	HLA-DRB5, IFNGR1, IFNGR2, STAT3, NFKB1, HLA-DMA, HLA-DMB, MAF, HLA-DPB1, STAT4, HLA-DRA, HLA-DOA, HLA-DQA2, HLA-DQA1, HLA-DRB1, HLA-DPA1, HLA-DQB1, TLR2	418	65	8840	5.85646	1.45521e-06	1.32723e-07	1.08591e-07
KEGG_PATHWAY	hsa04672	Intestinal immune network for IgA production	15	2.08044	3.22785e-08	CD86, HLA-DRB5, TNFSF13, CXCR4, TNFSF13B, HLA-DMA, HLA-DMB, HLA-DPB1, HLA-DRA, HLA-DOA, HLA-DQA2, HLA-DQA1, HLA-DRB1, HLA-DPA1, HLA-DQB1	418	49	8840	6.47398	9.90946e-06	8.28482e-07	6.77849e-07
KEGG_PATHWAY	hsa05310	Asthma	12	1.66436	8.12654e-08	HLA-DMA, HLA-DRB5, HLA-DMB, FCER1G, HLA-DPB1, HLA-DRA, HLA-DOA, HLA-DQA2, HLA-DRB1, HLA-DQA1, HLA-DPA1, HLA-DQB1	418	31	8840	8.18645	2.49482e-05	1.88612e-06	1.54319e-06
KEGG_PATHWAY	hsa05416	Viral myocarditis	17	2.35784	8.62092e-08	CD86, HLA-DRB5, DTNA, ITGB2, ICAM1, HLA-E, HLA-DMA, HLA-DMB, HLA-DPB1, HLA-DRA, ABL2, HLA-DOA, HLA-DQA2, HLA-DQA1, HLA-DRB1, HLA-DPA1, HLA-DQB1	418	69	8840	5.21046	2.64659e-05	1.88612e-06	1.54319e-06
KEGG_PATHWAY	hsa05330	Allograft rejection	13	1.80305	9.18563e-08	CD86, HLA-DRB5, HLA-E, HLA-DMA, HLA-DMB, HLA-DPB1, HLA-DRA, HLA-DOA, HLA-DQA2, HLA-DQA1, HLA-DRB1, HLA-DPA1, HLA-DQB1	418	38	8840	7.23495	2.81995e-05	1.88612e-06	1.54319e-06
KEGG_PATHWAY	hsa04640	Hematopoietic cell lineage	20	2.77393	1.37038e-07	CSF1R, HLA-DRB5, CSF3R, TFRC, CSF2RA, HLA-DMA, CD4, HLA-DMB, IL2RA, HLA-DPB1, HLA-DRA, CD37, CD14, FCGR1A, HLA-DOA, HLA-DQA2, HLA-DQA1, HLA-DRB1, HLA-DPA1, HLA-DQB1	418	99	8840	4.27239	4.20697e-05	2.63798e-06	2.15834e-06
KEGG_PATHWAY	hsa04940	Type I diabetes mellitus	13	1.80305	4.19621e-07	CD86, HLA-DRB5, HLA-E, HLA-DMA, HLA-DMB, HLA-DPB1, HLA-DRA, HLA-DOA, HLA-DQA2, HLA-DQA1, HLA-DRB1, HLA-DPA1, HLA-DQB1	418	43	8840	6.39368	0.000128815	7.60255e-06	6.22027e-06
KEGG_PATHWAY	hsa05332	Graft-versus-host disease	13	1.80305	5.52684e-07	CD86, HLA-DRB5, HLA-E, HLA-DMA, HLA-DMB, HLA-DPB1, HLA-DRA, HLA-DOA, HLA-DQA2, HLA-DQA1, HLA-DRB1, HLA-DPA1, HLA-DQB1	418	44	8840	6.24837	0.00016966	9.45704e-06	7.73758e-06
KEGG_PATHWAY	hsa05145	Toxoplasmosis	20	2.77393	8.81651e-07	CIITA, HLA-DRB5, IFNGR1, IFNGR2, STAT3, LY96, NFKB1, PIK3R5, HLA-DMA, HLA-DMB, ALOX5, HLA-DPB1, HLA-DRA, HLA-DOA, HLA-DQA2, HLA-DQA1, HLA-DRB1, HLA-DPA1, HLA-DQB1, TLR2	418	111	8840	3.81051	0.00027063	1.4292e-05	1.16935e-05
KEGG_PATHWAY	hsa05320	Autoimmune thyroid disease	13	1.80305	4.74882e-06	CD86, HLA-DRB5, HLA-E, HLA-DMA, HLA-DMB, HLA-DPB1, HLA-DRA, HLA-DOA, HLA-DQA2, HLA-DQA1, HLA-DRB1, HLA-DPA1, HLA-DQB1	418	53	8840	5.18733	0.00145683	7.31319e-05	5.98352e-05
KEGG_PATHWAY	hsa05164	Influenza A	24	3.32871	5.49032e-06	IFNAR2, MAP2K1, CIITA, HLA-DRB5, APAF1, IFNGR1, IFNGR2, MX2, PIK3R1, NFKB1, ICAM1, HLA-DMA, HLA-DMB, HLA-DPB1, HLA-DRA, NLRP3, TLR7, NUP98, HLA-DOA, HLA-DQA2, HLA-DQA1, HLA-DRB1, HLA-DPA1, HLA-DQB1	418	172	8840	2.95093	0.00168411	8.05247e-05	6.58838e-05
KEGG_PATHWAY	hsa05169	Epstein-Barr virus infection	26	3.6061	9.53391e-06	RB1, CDKN1A, PIK3R1, RBPJ, ICAM1, HLA-DMA, HLA-DMB, HLA-DOA, HLA-DQA2, HLA-DQA1, HLA-DPA1, LYN, IFNAR2, HLA-DRB5, SYK, APAF1, STAT3, NFKB1, SAP30, HLA-E, NCOR2, HLA-DPB1, HLA-DRA, HLA-DRB1, HLA-DQB1, TLR2	418	203	8840	2.70865	0.00292264	0.000133475	0.000109207
KEGG_PATHWAY	hsa04148	Efferocytosis	22	3.05132	1.26709e-05	C1QB, ABCA1, CX3CR1, C1QA, MAP2K1, CEBPB, LRP1, MERTK, HIF1A, SIRT1, CH25H, GPR132, AXL, ALOX5, STAB1, ELMO1, SIRPA, SGK1, GAS6, HAVCR2, C1QC, PPARD	418	156	8840	2.98246	0.00388243	0.00016968	0.000138829
KEGG_PATHWAY	hsa04610	Complement and coagulation cascades	16	2.21914	1.32523e-05	C1QB, CFD, C1QA, SERPINA1, ITGB2, C5AR1, PLAUR, F13A1, C2, C3, ITGAX, C3AR1, SERPING1, VSIG4, A2M, C1QC	418	88	8840	3.84515	0.00406023	0.000170072	0.00013915
KEGG_PATHWAY	hsa04514	Cell adhesion molecules	22	3.05132	1.40019e-05	CD86, HLA-DRB5, CADM1, SDC2, SDC3, ITGB2, VSIR, ICAM1, HLA-E, HLA-DMA, CD4, HLA-DMB, HLA-DPB1, HLA-DRA, SIGLEC1, HLA-DOA, HLA-DQA2, HLA-DQA1, HLA-DRB1, ITGA9, HLA-DPA1, HLA-DQB1	418	157	8840	2.96346	0.00428938	0.000172503	0.000141139
KEGG_PATHWAY	hsa05167	Kaposi sarcoma-associated herpesvirus infection	25	3.46741	1.58563e-05	RB1, CD86, CDKN1A, PDGFB, ITPR2, PIK3R1, HIF1A, PIK3R5, ICAM1, C3, PPP3R1, ZFP36, GNG7, LYN, IFNAR2, MAP2K1, SYK, IFNGR1, STAT3, FOS, NFKB1, HLA-E, VEGFA, HCK, GNB4	418	196	8840	2.69749	0.00485611	0.000187837	0.000153685
KEGG_PATHWAY	hsa05166	Human T-cell leukemia virus 1 infection	27	3.7448	1.71108e-05	RB1, CDKN1A, SPI1, ITGB2, PIK3R1, ETS2, ICAM1, PPP3R1, HLA-DMA, ZFP36, HLA-DMB, HLA-DOA, HLA-DQA2, HLA-DQA1, HLA-DPA1, MAP2K1, HLA-DRB5, FOS, TGFBR1, NFKB1, HLA-E, CD4, IL2RA, HLA-DPB1, HLA-DRA, HLA-DRB1, HLA-DQB1	418	223	8840	2.56056	0.0052393	0.00019519	0.000159701
KEGG_PATHWAY	hsa05322	Systemic lupus erythematosus	20	2.77393	2.63474e-05	C1QB, CD86, C1QA, HLA-DRB5, C2, C3, HLA-DMA, FCGR3A, FCGR2A, HLA-DMB, HLA-DPB1, HLA-DRA, FCGR1A, HLA-DOA, HLA-DQA2, HLA-DQA1, HLA-DRB1, HLA-DPA1, C1QC, HLA-DQB1	418	139	8840	3.04292	0.00805613	0.000289821	0.000237126
KEGG_PATHWAY	hsa04666	Fc gamma R-mediated phagocytosis	16	2.21914	4.95072e-05	LYN, ACTR2, MAP2K1, SYK, PRKCE, LIMK2, PIK3R1, GAB2, DNM2, HCK, FCGR3A, MARCKS, FCGR2A, BIN1, INPP5D, FCGR1A	418	98	8840	3.45279	0.0150842	0.000525801	0.000430201
KEGG_PATHWAY	hsa04062	Chemokine signaling pathway	23	3.19001	0.000106283	LYN, CX3CR1, MAP2K1, ROCK1, STAT3, CXCR4, PIK3R1, ARRB2, FOXO3, NFKB1, PIK3R5, CXCL16, TIAM1, HCK, GRK3, RAP1A, GNG7, GNAQ, GNB4, ELMO1, PTK2B, GRB2, DOCK2	418	193	8840	2.52027	0.032104	0.00109117	0.000892776
KEGG_PATHWAY	hsa04216	Ferroptosis	10	1.38696	0.00011787	TFRC, ACSL1, FTH1, NCOA4, SLC40A1, CYBB, ACSL3, ATG7, SAT1, FTL	418	42	8840	5.03532	0.0355414	0.0011711	0.000958173
KEGG_PATHWAY	hsa05135	Yersinia infection	17	2.35784	0.000757286	ACTR2, MAP2K1, FYB1, ROCK1, WIPF1, PIK3R1, FOS, NFKB1, RPS6KA3, CD4, FCGR2A, GNAQ, ELMO1, PTK2B, NLRP3, LCP2, SKAP2	418	138	8840	2.60523	0.20751	0.00728888	0.00596363
KEGG_PATHWAY	hsa04928	Parathyroid hormone synthesis, secretion and action	15	2.08044	0.00098732	MEF2A, CDKN1A, MAP2K1, MEF2C, ITPR2, FOS, ARRB2, NR4A2, GNA13, AKAP13, MAFB, GNAQ, GNA12, PDE4B, SGK1	418	115	8840	2.75848	0.261591	0.0091383	0.00747679
KEGG_PATHWAY	hsa05133	Pertussis	12	1.66436	0.00100877	C1QB, C3, C1QA, ITGB2, NLRP3, SERPING1, LY96, FOS, CD14, NFKB1, C1QC, C2	418	78	8840	3.25359	0.266443	0.0091383	0.00747679
KEGG_PATHWAY	hsa05221	Acute myeloid leukemia	11	1.52566	0.00122141	CSF1R, MAP2K1, SPI1, STAT3, GRB2, CD14, PIK3R1, FCGR1A, NFKB1, PPARD, RUNX1	418	68	8840	3.42105	0.312849	0.0107484	0.00879415
KEGG_PATHWAY	hsa04071	Sphingolipid signaling pathway	15	2.08044	0.00175783	MAP2K1, ASAH1, FCER1G, ROCK1, SGMS1, PRKCE, PIK3R1, GAB2, NFKB1, GNA13, SGPL1, SPTLC3, GNAQ, GNA12, CTSD	418	122	8840	2.6002	0.417326	0.0148988	0.0121899
KEGG_PATHWAY	hsa04066	HIF-1 signaling pathway	14	1.94175	0.00178979	CDKN1A, MAP2K1, PFKFB3, TFRC, IFNGR1, IFNGR2, STAT3, CYBB, PIK3R1, IGF1, HIF1A, NFKB1, VEGFA, MKNK1	418	109	8840	2.7163	0.423025	0.0148988	0.0121899
KEGG_PATHWAY	hsa04022	cGMP-PKG signaling pathway	18	2.49653	0.00209854	MEF2A, MAP2K1, MEF2C, ROCK1, PRKCE, ITPR2, ATP1B3, IRS2, ATP1B1, SLC8A1, PIK3R5, GNA13, PPP1CB, RGS2, PPP3R1, GNAQ, KCNMA1, GNA12	418	166	8840	2.29319	0.475301	0.0170093	0.0139167
KEGG_PATHWAY	hsa04611	Platelet activation	15	2.08044	0.00221506	LYN, FCER1G, SYK, ROCK1, ITPR2, PIK3R1, PIK3R5, VAMP8, GNA13, PPP1CB, FCGR2A, RAP1A, GNAQ, TBXAS1, LCP2	418	125	8840	2.5378	0.493776	0.0174933	0.0143127
KEGG_PATHWAY	hsa04810	Regulation of actin cytoskeleton	22	3.05132	0.00281148	ACTR2, MAP2K1, ROCK1, LIMK2, ITGB2, PDGFB, CXCR4, PIK3R1, IQGAP2, SSH2, SSH1, GNA13, PPP1CB, TIAM1, DIAPH2, PIKFYVE, PDGFC, GNA12, ITGAX, NCKAP1L, EZR, ITGA9	418	230	8840	2.02288	0.57867	0.0216484	0.0177123
KEGG_PATHWAY	hsa05417	Lipid and atherosclerosis	21	2.91262	0.00296941	LYN, ABCA1, APAF1, NCF4, STAT3, CYBB, LY96, CYBA, PIK3R1, FOS, POU2F2, SOD2, NFKB1, ICAM1, PPP3R1, RAP1A, NLRP3, CD14, ATF6, NFE2L2, TLR2	418	216	8840	2.05609	0.598667	0.0223068	0.018251
KEGG_PATHWAY	hsa00513	Various types of N-glycan biosynthesis	8	1.10957	0.00318072	B4GALT1, MAN2A1, HEXB, MGAT4A, HEXA, ALG13, MGAT1, MAN1A1	418	42	8840	4.02825	0.623951	0.0228729	0.0187142
KEGG_PATHWAY	hsa04650	Natural killer cell mediated cytotoxicity	15	2.08044	0.00319329	IFNAR2, MAP2K1, FCER1G, SYK, IFNGR1, IFNGR2, ITGB2, PIK3R1, ICAM1, FCGR3A, PPP3R1, TYROBP, PTK2B, LCP2, GRB2	418	130	8840	2.44019	0.625404	0.0228729	0.0187142
KEGG_PATHWAY	hsa00600	Sphingolipid metabolism	9	1.24827	0.00353667	UGCG, ASAH1, SGPL1, SGMS1, SPTLC3, HEXB, HEXA, ACER3, PSAP	418	54	8840	3.52472	0.663003	0.0242866	0.0198708
KEGG_PATHWAY	hsa04662	B cell receptor signaling pathway	12	1.66436	0.00354836	LYN, MAP2K1, PPP3R1, CD72, SYK, INPP5D, GRB2, FOS, PIK3R1, PIK3AP1, NFKB1, MALT1	418	91	8840	2.78879	0.664215	0.0242866	0.0198708
KEGG_PATHWAY	hsa04613	Neutrophil extracellular trap formation	19	2.63523	0.00413253	MAP2K1, SYK, ITGB2, NCF4, C5AR1, FPR1, CYBB, FPR3, CYBA, PIK3R1, NFKB1, C3, FCGR3A, FCGR2A, CLEC7A, TLR7, FCGR1A, ATG7, TLR2	418	192	8840	2.0928	0.719537	0.0274358	0.0224475
KEGG_PATHWAY	hsa01521	EGFR tyrosine kinase inhibitor resistance	11	1.52566	0.00418663	MAP2K1, AXL, PDGFC, STAT3, PDGFB, GRB2, IGF1, PIK3R1, FOXO3, GAS6, VEGFA	418	80	8840	2.90789	0.724176	0.0274358	0.0224475
KEGG_PATHWAY	hsa04072	Phospholipase D signaling pathway	16	2.21914	0.00441652	MAP2K1, FCER1G, SYK, PDGFB, PIK3R1, GAB2, PIK3R5, DNM2, GNA13, CYTH4, LPAR6, PDGFC, GNA12, PTK2B, GRB2, CYTH1	418	149	8840	2.27096	0.74305	0.0283393	0.0231867
KEGG_PATHWAY	hsa04664	Fc epsilon RI signaling pathway	10	1.38696	0.00486696	LYN, MAP2K1, FCER1G, SYK, ALOX5, INPP5D, LCP2, GRB2, GAB2, PIK3R1	418	69	8840	3.06497	0.776379	0.0305923	0.0250301
KEGG_PATHWAY	hsa05200	Pathways in cancer	39	5.40915	0.00656803	RB1, NOTCH2, CSF1R, CDKN1A, SPI1, CSF3R, ROCK1, PDGFB, CXCR4, PIK3R1, BRCA2, HIF1A, CSF2RA, GNA13, GNG7, GNA12, STAT4, IFNAR2, MAP2K1, APAF1, IFNGR1, DAPK1, IFNGR2, NCOA4, STAT3, MITF, IGF1, FOS, TGFBR1, NFKB1, RUNX1, VEGFA, LPAR6, GNAQ, IL2RA, GNB4, GRB2, PPARD, NFE2L2	418	533	8840	1.54744	0.867747	0.0404591	0.0331029
KEGG_PATHWAY	hsa04144	Endocytosis	22	3.05132	0.00803395	ACTR2, TFRC, WIPF1, CXCR4, ARAP1, ARRB2, AGAP3, AP2A2, TGFBR1, DNM2, HLA-E, DAB2, GRK3, RAB31, CYTH4, BIN1, IL2RA, CHMP1B, SMAP2, FOLR2, CYTH1, SNX6	418	252	8840	1.84628	0.915953	0.0485187	0.0396972
KEGG_PATHWAY	hsa05171	Coronavirus disease - COVID-19	21	2.91262	0.00876099	C1QB, CFD, IFNAR2, C1QA, SYK, MX2, STAT3, C5AR1, CYBB, F13A1, PIK3R1, FOS, NFKB1, C2, C3, FCGR2A, C3AR1, NLRP3, TLR7, C1QC, TLR2	418	238	8840	1.86603	0.932894	0.051892	0.0424571
KEGG_PATHWAY	hsa05142	Chagas disease	12	1.66436	0.00904257	C1QB, C3, C1QA, IFNGR1, IFNGR2, GNAQ, FOS, PIK3R1, NFKB1, TGFBR1, TLR2, C1QC	418	103	8840	2.46388	0.938499	0.0525493	0.0429948
KEGG_PATHWAY	hsa05235	PD-L1 expression and PD-1 checkpoint pathway in cancer	11	1.52566	0.009595	MAP2K1, CD4, PPP3R1, IFNGR1, IFNGR2, STAT3, FOS, PIK3R1, HIF1A, NFKB1, TLR2	418	90	8840	2.5848	0.948175	0.0539175	0.0441144
KEGG_PATHWAY	hsa05202	Transcriptional misregulation in cancer	18	2.49653	0.00962813	CD86, CSF1R, CDKN1A, MEF2C, CEBPB, SPI1, MITF, IGF1, AFF1, NFKB1, ETV6, RUNX1, NR4A3, MAF, BMP2K, REL, CD14, FCGR1A	418	193	8840	1.97238	0.948705	0.0539175	0.0441144
KEGG_PATHWAY	hsa05163	Human cytomegalovirus infection	20	2.77393	0.0104241	RB1, CDKN1A, MAP2K1, ROCK1, STAT3, CXCR4, ITPR2, PIK3R1, NFKB1, HLA-E, VEGFA, GNA13, AKAP13, PPP3R1, GNG7, GNAQ, GNA12, GNB4, PTK2B, GRB2	418	226	8840	1.87153	0.959924	0.0573324	0.0469084
KEGG_PATHWAY	hsa00510	N-Glycan biosynthesis	8	1.10957	0.0116652	ST6GAL1, B4GALT1, MAN2A1, MGAT4A, MGAT5, ALG13, MGAT1, MAN1A1	418	53	8840	3.1922	0.972738	0.0630332	0.0515726
KEGG_PATHWAY	hsa04140	Autophagy - animal	16	2.21914	0.0136106	RAB1A, MAP2K1, DAPK1, STX7, IRS2, PIK3R1, WIPI2, HIF1A, C9ORF72, VAMP8, VMP1, CTSL, WDFY3, ATG7, CTSD, CTSB	418	169	8840	2.00221	0.985111	0.0722768	0.0591356
KEGG_PATHWAY	hsa05130	Pathogenic Escherichia coli infection	18	2.49653	0.0153669	RAB1A, ACTR2, ROCK1, WIPF1, MYO5A, FOS, NFKB1, GNA13, FCGR2A, CYTH4, GNA12, HCLS1, NLRP3, NCKAP1L, EZR, CYTH1, MYO1F, NAIP	418	203	8840	1.87522	0.991385	0.0798934	0.0653673
KEGG_PATHWAY	hsa05134	Legionellosis	8	1.10957	0.0155637	C3, RAB1A, APAF1, ITGB2, CD14, NFKB1, NAIP, TLR2	418	56	8840	3.02119	0.991898	0.0798934	0.0653673
KEGG_PATHWAY	hsa05205	Proteoglycans in cancer	18	2.49653	0.0160625	CDKN1A, MAP2K1, ROCK1, SDC2, STAT3, PLAUR, ITPR2, PIK3R1, IGF1, HIF1A, VEGFA, PPP1CB, TIAM1, CTSL, HCLS1, GRB2, EZR, TLR2	418	204	8840	1.86603	0.993065	0.0811023	0.0663564
KEGG_PATHWAY	hsa05211	Renal cell carcinoma	9	1.24827	0.0167153	CDKN1A, MAP2K1, RAP1A, PDGFB, RAPGEF1, GRB2, PIK3R1, HIF1A, VEGFA	418	70	8840	2.71907	0.994344	0.0830374	0.0679397
KEGG_PATHWAY	hsa04068	FoxO signaling pathway	13	1.80305	0.0217775	CDKN1A, MAP2K1, STAT3, PRKAG2, IRS2, PIK3R1, IGF1, FOXO3, SOD2, SIRT1, TGFBR1, GRB2, SGK1	418	132	8840	2.08279	0.99884	0.106468	0.08711
KEGG_PATHWAY	hsa04015	Rap1 signaling pathway	18	2.49653	0.0225445	FARP2, CSF1R, MAP2K1, DOCK4, FYB1, ITGB2, PDGFB, FPR1, PIK3R1, IGF1, VEGFA, TIAM1, RAP1A, SIPA1L1, GNAQ, PDGFC, RAPGEF1, LCP2	418	212	8840	1.79561	0.999088	0.108495	0.0887689
KEGG_PATHWAY	hsa04211	Longevity regulating pathway	10	1.38696	0.0256045	SESN1, SESN2, PRKAG2, IRS2, IGF1, PIK3R1, FOXO3, SOD2, SIRT1, NFKB1	418	90	8840	2.34981	0.999652	0.120149	0.0983039
KEGG_PATHWAY	hsa04722	Neurotrophin signaling pathway	12	1.66436	0.0259293	RPS6KA3, MAP2K1, RAP1A, RIPK2, RAPGEF1, GRB2, IRAK3, PIK3R1, PSEN1, FOXO3, SH2B3, NFKB1	418	120	8840	2.11483	0.999686	0.120149	0.0983039
KEGG_PATHWAY	hsa05131	Shigellosis	20	2.77393	0.0262959	ACTR2, ROCK1, FNBP1, RIPK2, PRKCE, UBE2D3, ITPR2, PIK3R1, WIPI2, FOXO3, MALT1, NFKB1, C3, CYTH4, ELMO1, HCLS1, NLRP3, CD14, CYTH1, NAIP	418	249	8840	1.69866	0.99972	0.120149	0.0983039
KEGG_PATHWAY	hsa04210	Apoptosis	13	1.80305	0.026783	MAP2K1, PARP4, APAF1, ITPR2, PIK3R1, FOS, CTSS, NFKB1, CTSL, CTSD, CTSC, CTSB, MCL1	418	136	8840	2.02153	0.99976	0.120149	0.0983039
KEGG_PATHWAY	hsa04630	JAK-STAT signaling pathway	15	2.08044	0.0273463	IFNAR2, CDKN1A, CSF3R, IFNGR1, IFNGR2, STAT3, PDGFB, PIK3R1, CSF2RA, PIAS1, IL2RA, STAT4, GRB2, PTPN2, MCL1	418	168	8840	1.88824	0.999799	0.120149	0.0983039
KEGG_PATHWAY	hsa05220	Chronic myeloid leukemia	9	1.24827	0.0280787	RB1, CDKN1A, MAP2K1, GRB2, GAB2, PIK3R1, NFKB1, TGFBR1, RUNX1	418	77	8840	2.47188	0.999841	0.120149	0.0983039
KEGG_PATHWAY	hsa05212	Pancreatic cancer	9	1.24827	0.0280787	RB1, CDKN1A, MAP2K1, STAT3, PIK3R1, BRCA2, NFKB1, TGFBR1, VEGFA	418	77	8840	2.47188	0.999841	0.120149	0.0983039
KEGG_PATHWAY	hsa03250	Viral life cycle - HIV-1	8	1.10957	0.0280868	RANBP2, CD4, ELL, MX2, CXCR4, AFF4, ELL2, SERINC5	418	63	8840	2.6855	0.999841	0.120149	0.0983039
KEGG_PATHWAY	hsa04921	Oxytocin signaling pathway	14	1.94175	0.0298832	CDKN1A, MAP2K1, MEF2C, CAMK1D, ROCK1, ITPR2, PRKAG2, FOS, PIK3R5, PPP1CB, TRPM2, RGS2, PPP3R1, GNAQ	418	154	8840	1.92258	0.99991	0.126082	0.103158
KEGG_PATHWAY	hsa04979	Cholesterol metabolism	7	0.970874	0.0318396	ABCA1, LRP1, SOAT1, NPC2, APOC1, APOE, PLTP	418	51	8840	2.90271	0.999951	0.13229	0.108237
KEGG_PATHWAY	hsa04371	Apelin signaling pathway	13	1.80305	0.0325795	MEF2A, MAP2K1, MEF2C, PRKCE, ITPR2, PRKAG2, TGFBR1, SLC8A1, PIK3R5, GNA13, GNG7, GNAQ, GNB4	418	140	8840	1.96377	0.999962	0.13229	0.108237
KEGG_PATHWAY	hsa04620	Toll-like receptor signaling pathway	11	1.52566	0.032643	CD86, IFNAR2, MAP2K1, LY96, TLR7, MAP3K8, FOS, CD14, PIK3R1, NFKB1, TLR2	418	109	8840	2.13423	0.999962	0.13229	0.108237
KEGG_PATHWAY	hsa05418	Fluid shear stress and atherosclerosis	13	1.80305	0.034159	MEF2A, MEF2C, DUSP1, SDC2, PDGFB, CYBA, PIK3R1, FOS, NFKB1, ICAM1, VEGFA, CTSL, NFE2L2	418	141	8840	1.94985	0.999977	0.136636	0.111793
KEGG_PATHWAY	hsa00603	Glycosphingolipid biosynthesis - globo and isoglobo series	4	0.554785	0.0369223	HEXB, HEXA, NAGA, ST3GAL1	418	16	8840	5.28708	0.99999	0.145796	0.119287
KEGG_PATHWAY	hsa04936	Alcoholic liver disease	13	1.80305	0.0392242	C1QB, C1QA, C5AR1, LY96, PRKAG2, FOXO3, SIRT1, NFKB1, C2, C3, C3AR1, CD14, C1QC	418	144	8840	1.90922	0.999995	0.152925	0.12512
KEGG_PATHWAY	hsa05219	Bladder cancer	6	0.832178	0.0423143	RB1, CDKN1A, MAP2K1, DAPK1, TYMP, VEGFA	418	41	8840	3.09488	0.999998	0.16291	0.13329
KEGG_PATHWAY	hsa05170	Human immunodeficiency virus 1 infection	17	2.35784	0.0441704	MAP2K1, LIMK2, AP1B1, CXCR4, ITPR2, PIK3R1, FOS, TNFRSF1B, NFKB1, HLA-E, CD4, PPP3R1, GNG7, GNAQ, GNB4, PTK2B, TLR2	418	213	8840	1.68789	0.999999	0.167825	0.137311
KEGG_PATHWAY	hsa04010	MAPK signaling pathway	22	3.05132	0.0446806	CSF1R, MAP2K1, MEF2C, DUSP1, PDGFB, IL1RAP, FOS, IGF1, ARRB2, TGFBR1, NFKB1, VEGFA, RPS6KA3, PPP3R1, RAP1A, TAOK3, MKNK1, PDGFC, GNA12, GRB2, MAP3K8, CD14	418	300	8840	1.55088	0.999999	0.167825	0.137311
KEGG_PATHWAY	hsa04670	Leukocyte transendothelial migration	11	1.52566	0.0468933	RAP1A, ROCK1, NCF4, ITGB2, CYBB, PTK2B, CXCR4, CYBA, PIK3R1, EZR, ICAM1	418	116	8840	2.00544	1	0.174014	0.142375
KEGG_PATHWAY	hsa00511	Other glycan degradation	4	0.554785	0.0502082	MANBA, HEXB, HEXA, MAN2B1	418	18	8840	4.69963	1	0.184081	0.150612
KEGG_PATHWAY	hsa05132	Salmonella infection	19	2.63523	0.0508017	ACTR2, MAP2K1, RIPK2, LY96, FOS, NFKB1, RHOB, DNM2, CYTH4, ELMO1, EXOC4, NLRP3, SNX9, NCKAP1L, CD14, CYTH1, NAIP, ARL8B, TLR2	418	251	8840	1.60087	1	0.184081	0.150612
KEGG_PATHWAY	hsa05223	Non-small cell lung cancer	8	1.10957	0.0557018	RB1, CDKN1A, MAP2K1, STAT3, GRB2, PIK3R1, FOXO3, FHIT	418	73	8840	2.31762	1	0.197197	0.161343
KEGG_PATHWAY	hsa05218	Melanoma	8	1.10957	0.0557018	RB1, CDKN1A, MAP2K1, PDGFC, PDGFB, MITF, IGF1, PIK3R1	418	73	8840	2.31762	1	0.197197	0.161343
KEGG_PATHWAY	hsa00531	Glycosaminoglycan degradation	4	0.554785	0.0576053	HGSNAT, HEXB, HEXA, GNS	418	19	8840	4.45228	1	0.201619	0.164961
KEGG_PATHWAY	hsa04730	Long-term depression	7	0.970874	0.0624504	GNA13, LYN, MAP2K1, GNAQ, GNA12, ITPR2, IGF1	418	60	8840	2.4673	1	0.21612	0.176826
KEGG_PATHWAY	hsa05214	Glioma	8	1.10957	0.0664326	RB1, CDKN1A, MAP2K1, CAMK1D, PDGFB, GRB2, IGF1, PIK3R1	418	76	8840	2.22614	1	0.225163	0.184224
KEGG_PATHWAY	hsa04978	Mineral absorption	7	0.970874	0.066647	FTH1, SLC40A1, ATP1B3, MT1X, ATP1B1, SLC8A1, FTL	418	61	8840	2.42686	1	0.225163	0.184224
KEGG_PATHWAY	hsa04218	Cellular senescence	13	1.80305	0.0672565	RB1, CDKN1A, MAP2K1, ITPR2, PIK3R1, FOXO3, SIRT1, HIPK3, TGFBR1, NFKB1, HLA-E, PPP1CB, PPP3R1	418	157	8840	1.75114	1	0.225163	0.184224
KEGG_PATHWAY	hsa05208	Chemical carcinogenesis - reactive oxygen species	17	2.35784	0.0687169	PTPN1, MAP2K1, PTPRJ, CYBA, PIK3R1, FOS, FOXO3, MT-ND2, SOD2, HIF1A, MT-ND3, NFKB1, MT-ND1, VEGFA, ABL2, GRB2, NFE2L2	418	226	8840	1.5908	1	0.227578	0.186201
KEGG_PATHWAY	hsa04330	Notch signaling pathway	7	0.970874	0.0710043	NOTCH2, NCOR2, ATXN1, MAML2, MAML3, PSEN1, RBPJ	418	62	8840	2.38771	1	0.230204	0.188348
KEGG_PATHWAY	hsa04213	Longevity regulating pathway - multiple species	7	0.970874	0.0710043	PRKAG2, IRS2, IGF1, PIK3R1, FOXO3, SOD2, SIRT1	418	62	8840	2.38771	1	0.230204	0.188348
KEGG_PATHWAY	hsa00532	Glycosaminoglycan biosynthesis - chondroitin sulfate / dermatan sulfate	4	0.554785	0.0738285	CSGALNACT1, CHST11, DSE, UST	418	21	8840	4.02825	1	0.236866	0.1938
KEGG_PATHWAY	hsa04721	Synaptic vesicle cycle	8	1.10957	0.0783272	ATP6V0B, ATP6V1B2, SLC1A3, AP2A2, ATP6V0C, ATP6V1C1, ATP6V0A1, DNM2	418	79	8840	2.1416	1	0.248709	0.203489
KEGG_PATHWAY	hsa05161	Hepatitis B	13	1.80305	0.083753	RB1, CDKN1A, MAP2K1, APAF1, STAT3, PIK3R1, FOS, TGFBR1, NFKB1, STAT4, PTK2B, GRB2, TLR2	418	163	8840	1.68668	1	0.263224	0.215365
KEGG_PATHWAY	hsa05144	Malaria	6	0.832178	0.0852977	GYPC, LRP1, SDC2, ITGB2, ICAM1, TLR2	418	50	8840	2.5378	1	0.265371	0.217122
KEGG_PATHWAY	hsa04151	PI3K-Akt signaling pathway	24	3.32871	0.0888714	IFNAR2, CSF1R, CDKN1A, MAP2K1, CSF3R, SYK, PDGFB, PIK3R1, IGF1, FOXO3, NFKB1, PIK3R5, VEGFA, LPAR6, GNG7, IL2RA, PDGFC, GNB4, GRB2, PIK3AP1, SGK1, ITGA9, MCL1, TLR2	418	362	8840	1.4021	1	0.273724	0.223956
KEGG_PATHWAY	hsa05215	Prostate cancer	9	1.24827	0.0908099	RB1, CDKN1A, MAP2K1, PDGFC, PDGFB, GRB2, IGF1, PIK3R1, NFKB1	418	98	8840	1.94219	1	0.276925	0.226575
KEGG_PATHWAY	hsa04720	Long-term potentiation	7	0.970874	0.0951789	PPP1CB, RPS6KA3, MAP2K1, PPP3R1, RAP1A, GNAQ, ITPR2	418	67	8840	2.20953	1	0.287403	0.235148
KEGG_PATHWAY	hsa04014	Ras signaling pathway	17	2.35784	0.0978645	CSF1R, MAP2K1, PDGFB, PIK3R1, GAB2, IGF1, ETS2, NFKB1, VEGFA, TIAM1, RAP1A, GNG7, PDGFC, REL, GNB4, ABL2, GRB2	418	238	8840	1.51059	1	0.292643	0.239435
